# Supplementary material for: Genetic dissection of the fuzzless seed trait in Gossypium barbadense
Source: PubMed Central journal article supplement (PMC6018843; doi:10.1093/jxb/erx459), 2018-01-17

**Figure S3** The Cotton SNP63K array based frequency of the Pima S-7 allele of the polymorphic SNPs between Pima S-7 and Sicala 40 in the NILs with normal or reduced fuzz. Chromosomes A02, A04 and D04 have less than 20 polymorphic SNPs (Table S3) and are not shown. \* indicates the potential candidate regions used in association analysis. Locus V represents the locus associated with fuzz development.

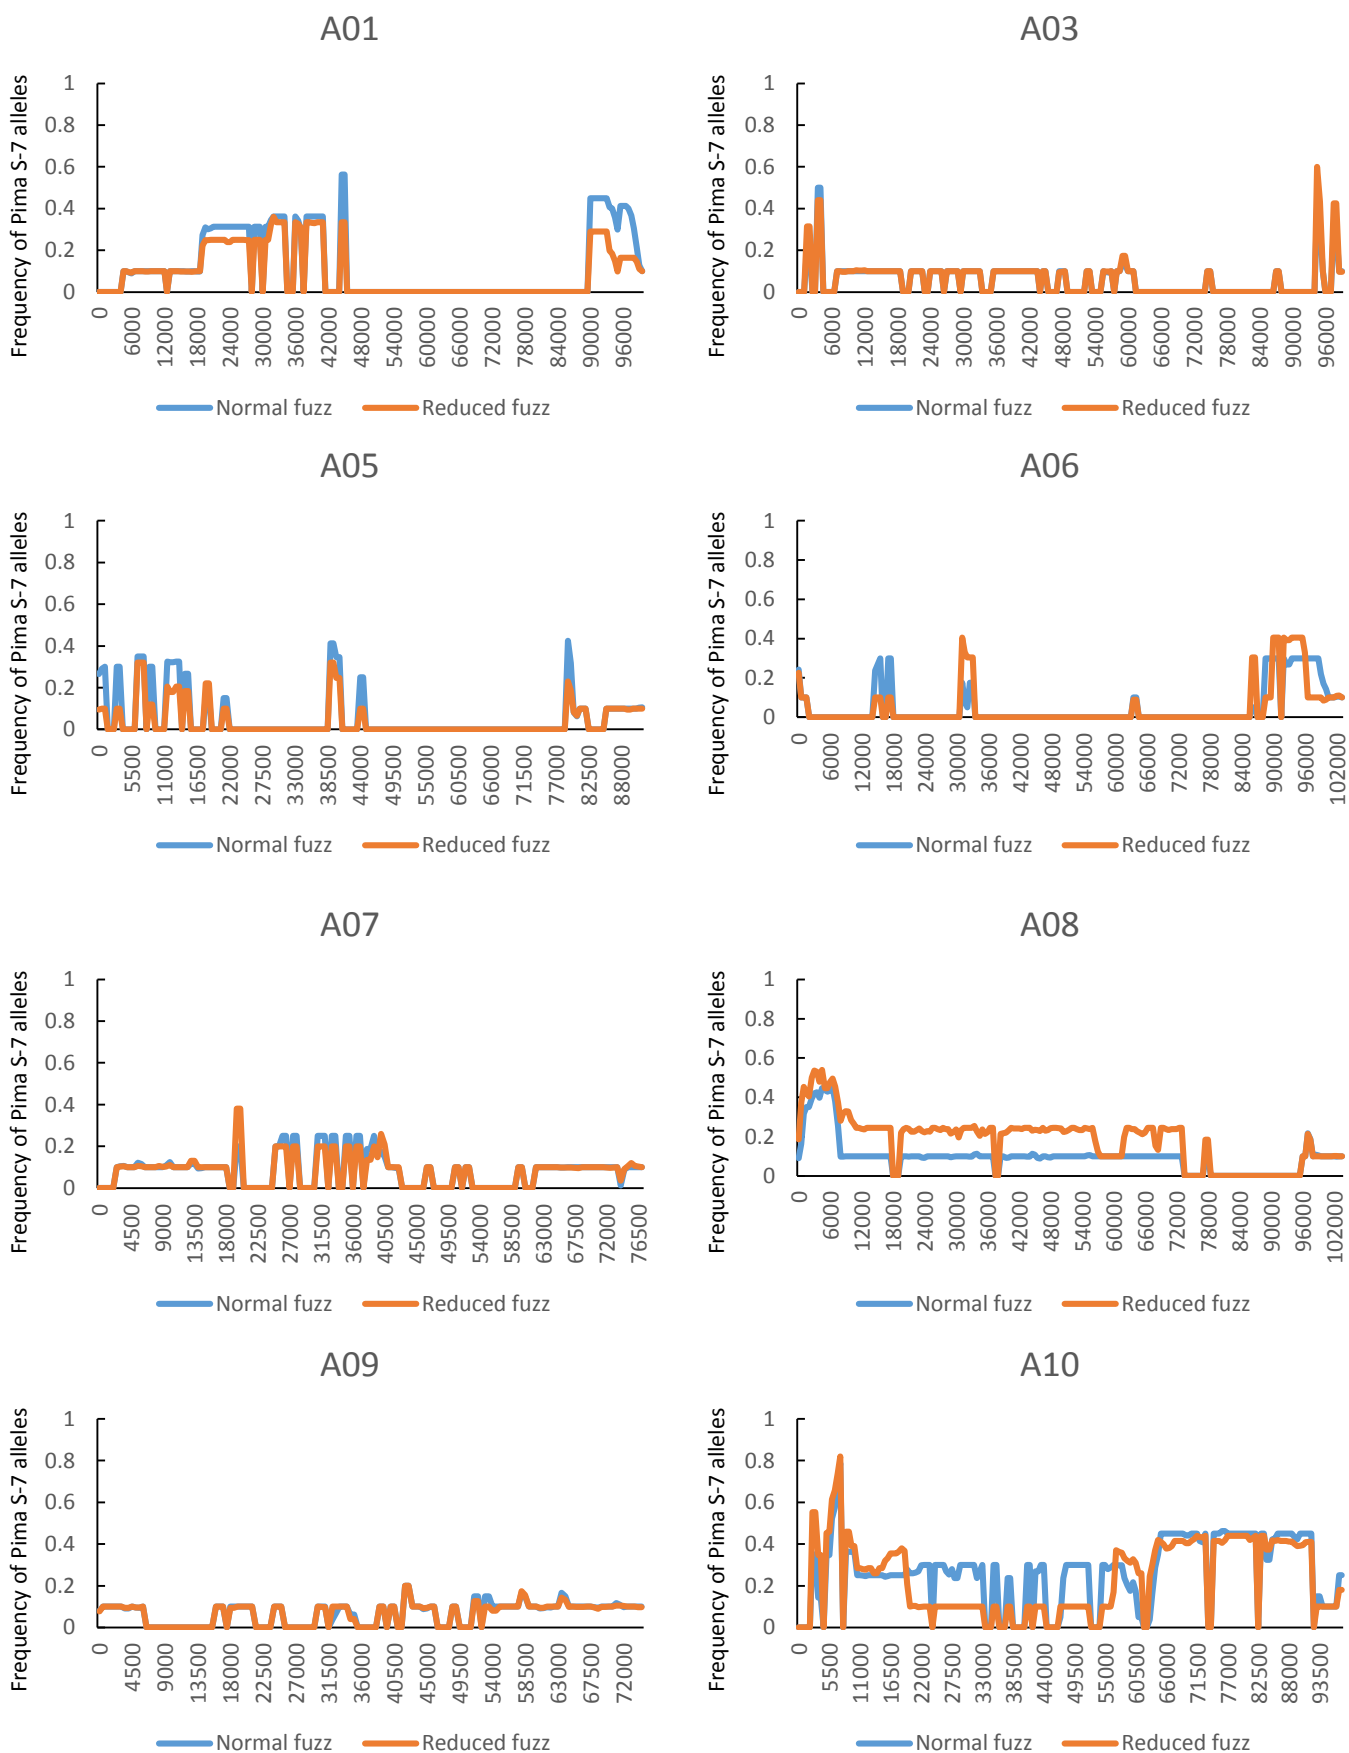

A11

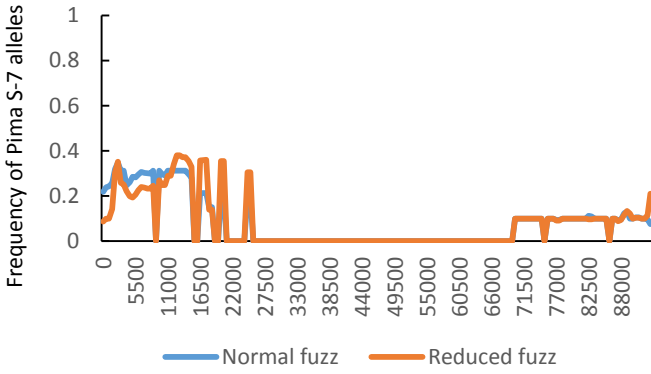

A12

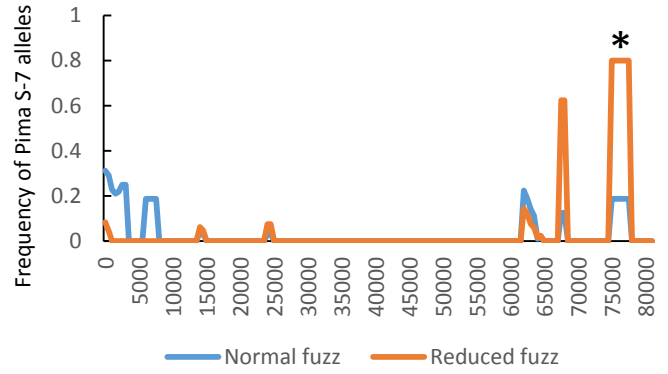

A13

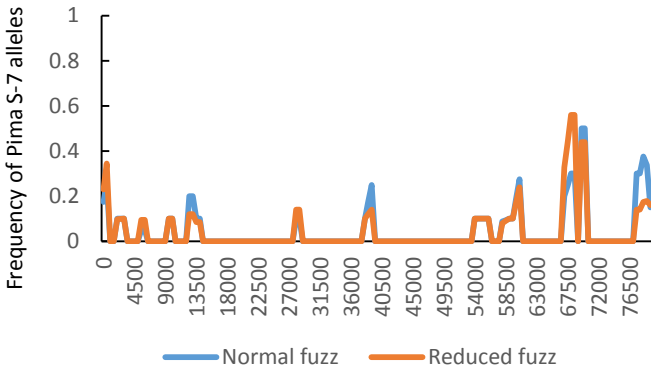

D01

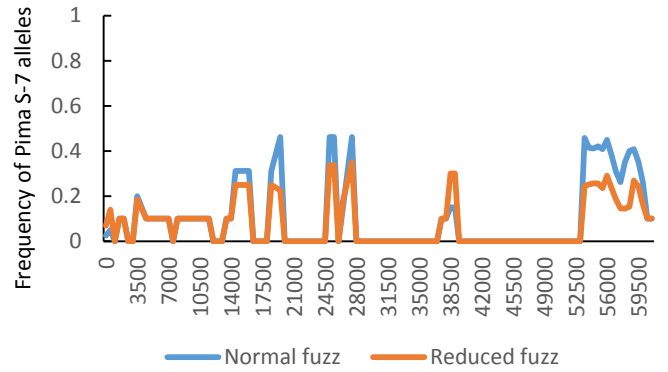

D02

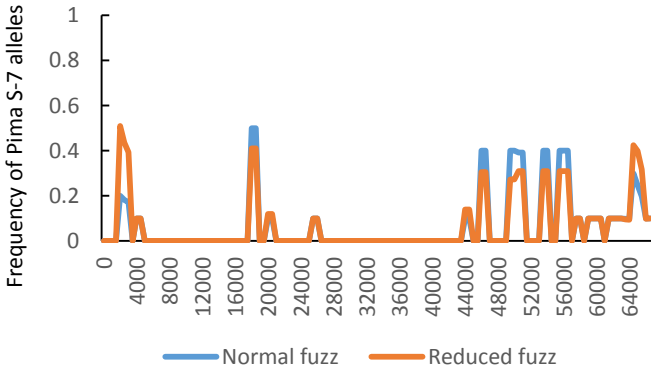

D03

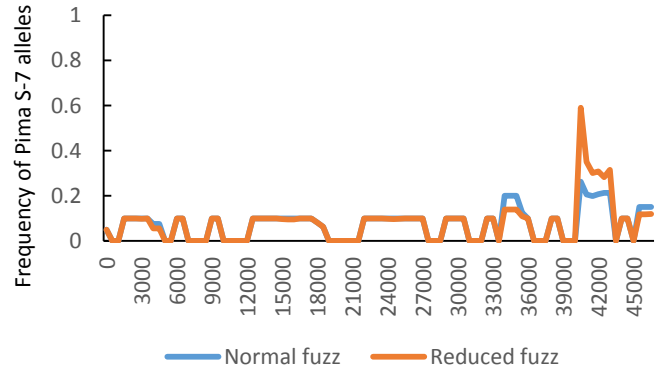

D05

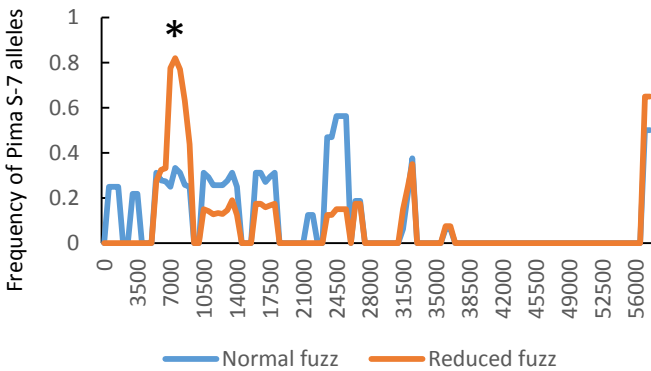

D06

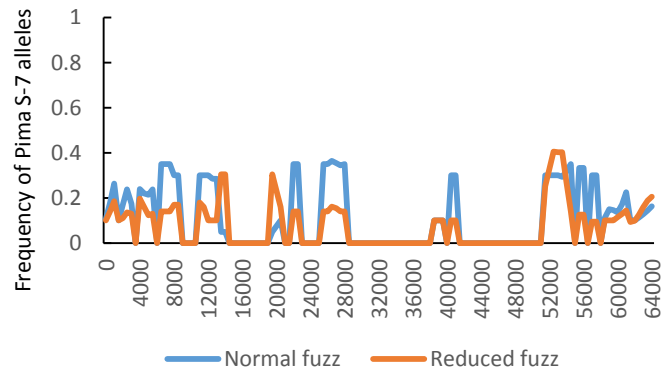

D07

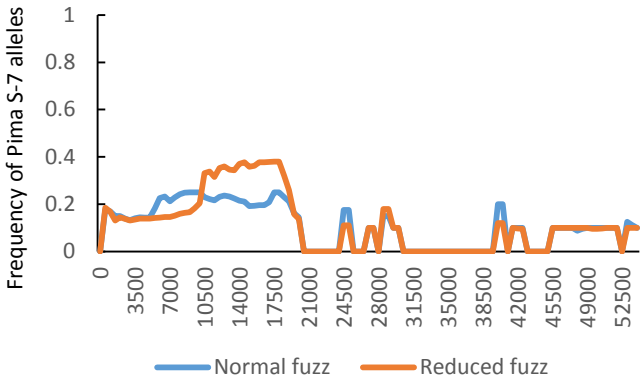

D08

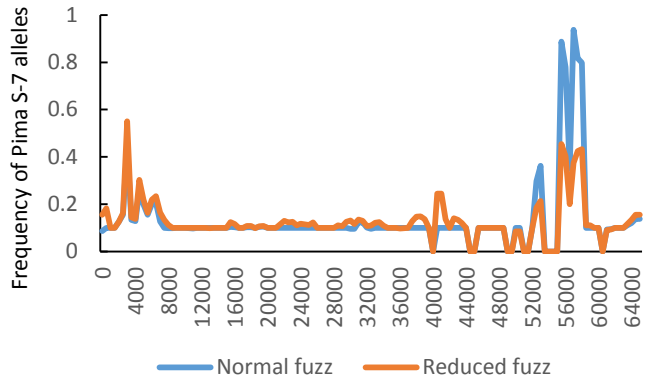

D09

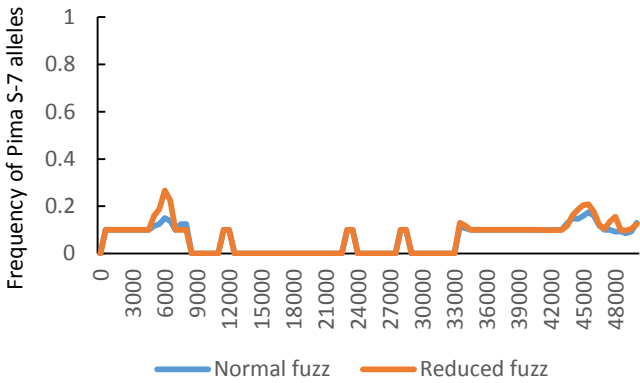

D10

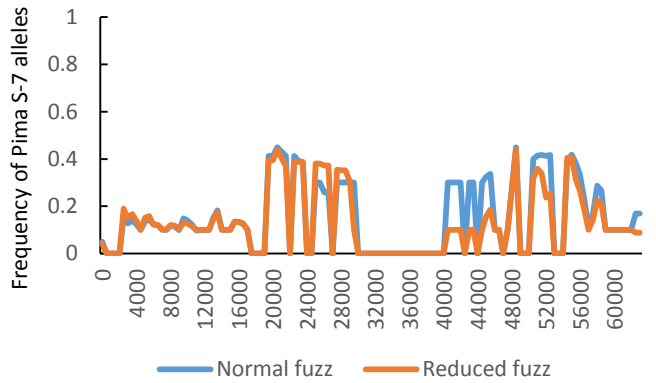

D11

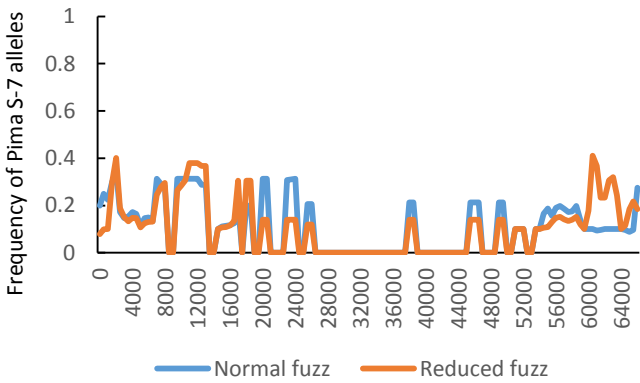

D12

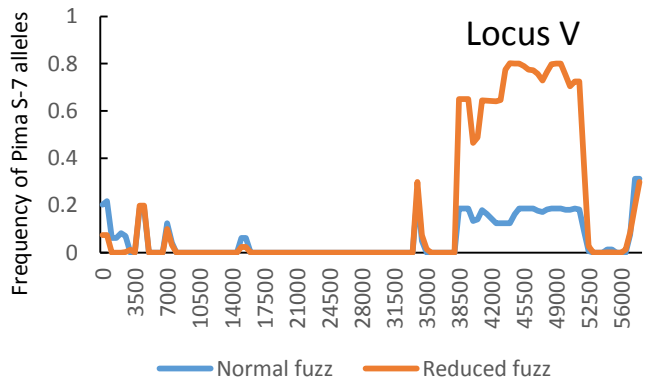

D13

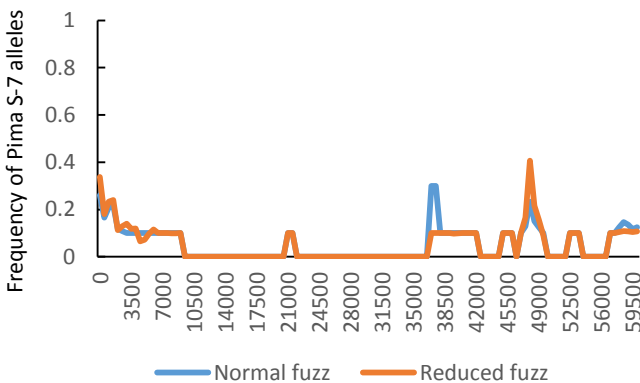

Supplement: erx459_suppl_supplementary_figure_s3.pdf [file erx459_suppl_supplementary_figure_s3.pdf]
