# Supplementary material for: Genetic dissection of the fuzzless seed trait in Gossypium barbadense
Source: PubMed Central journal article supplement (PMC6018843; doi:10.1093/jxb/erx459), 2018-01-17

**Figure S4** Distribution of the Pima S-7 allele frequency across the 26 cotton chromosomes in the NILs showing fuzzless (RFB2) and segregating fuzz phenotype (RFB1). \* indicates the potential candidate regions used in association analysis. Locus I, II, III, IV and V represent the five loci associated with fuzz development.

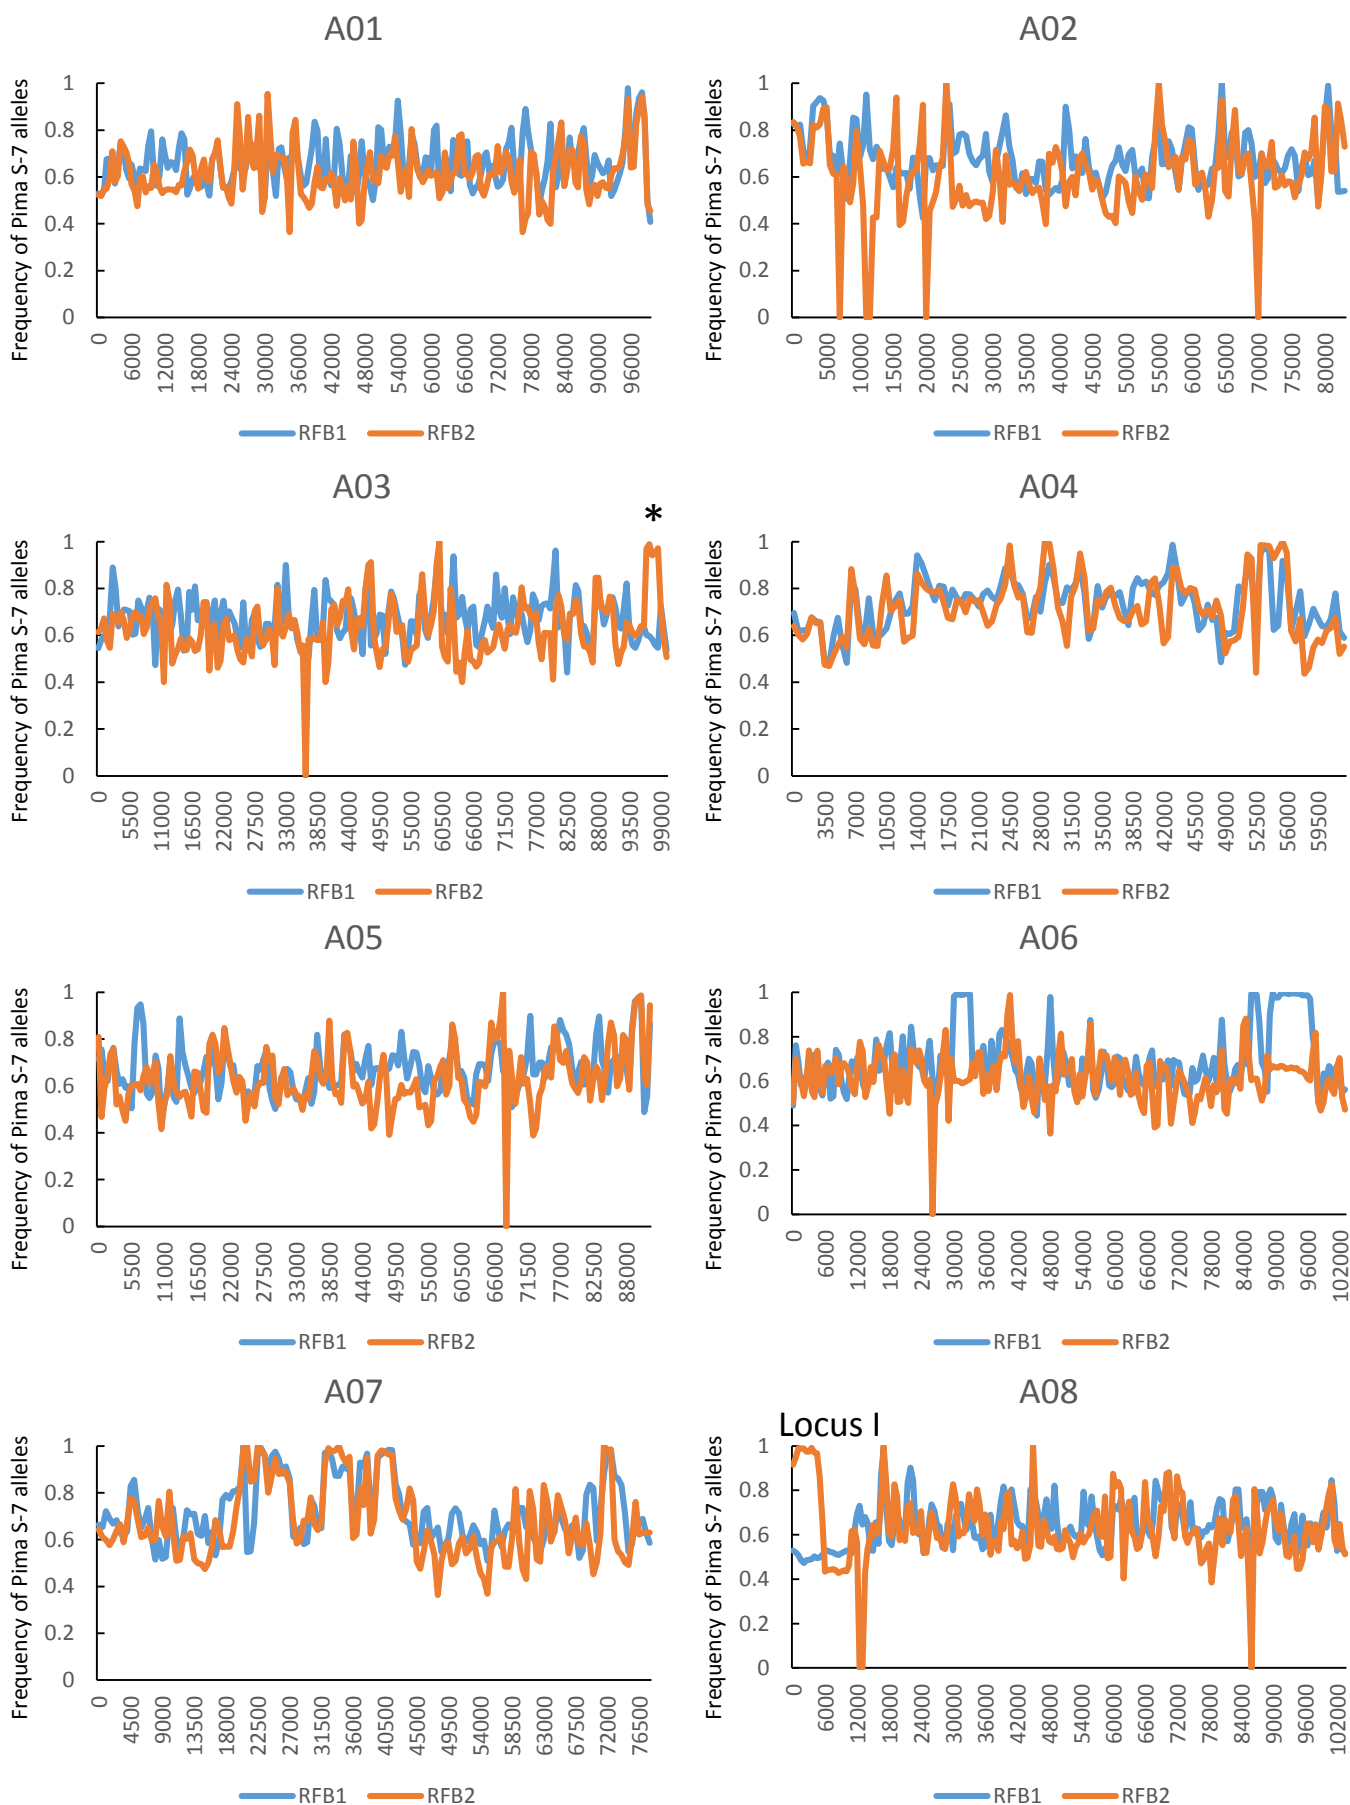

A09

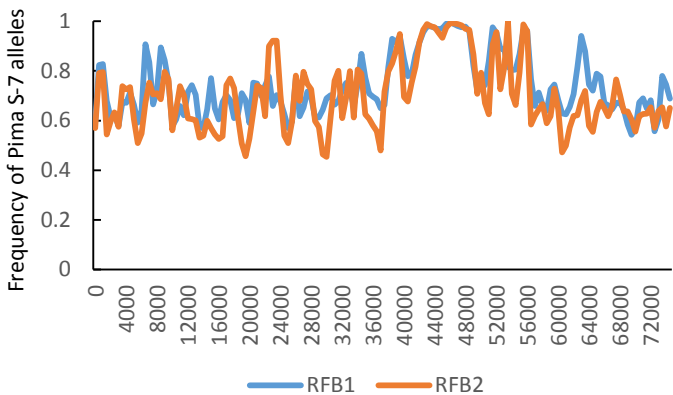

A10

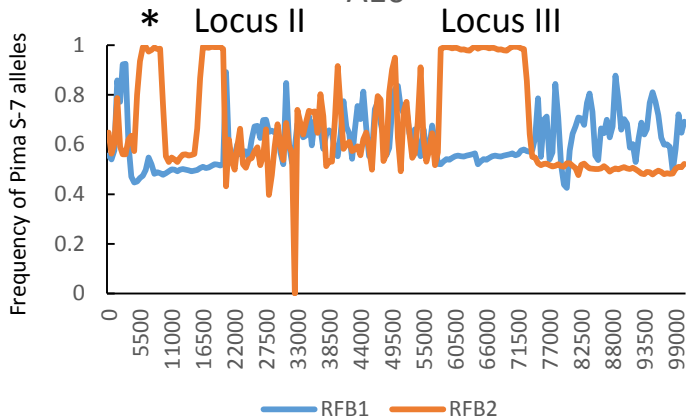

A11

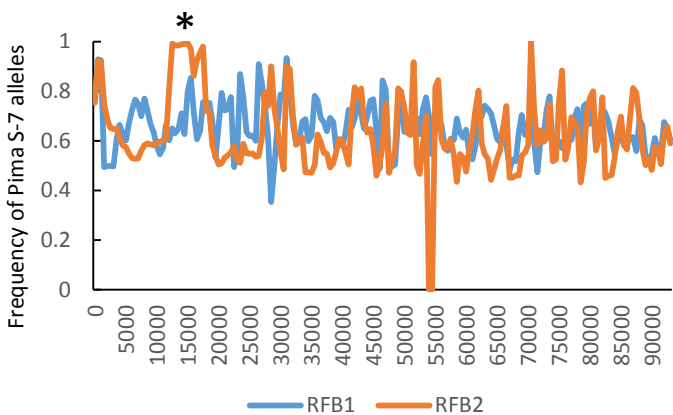

A12

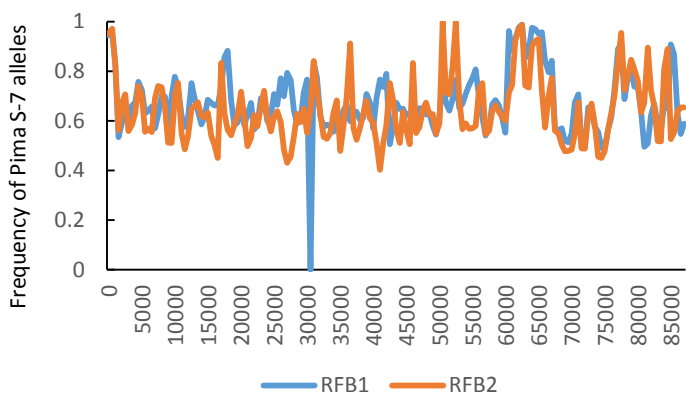

A13

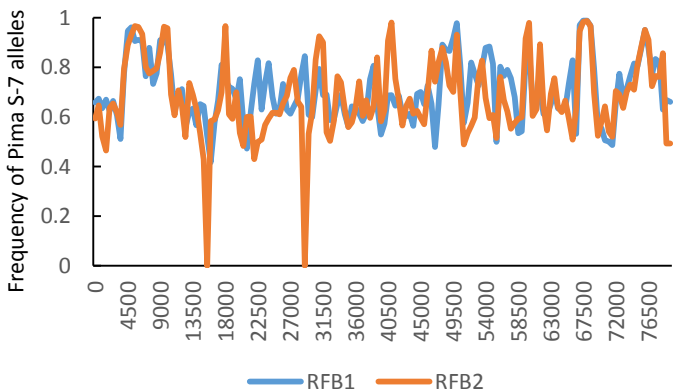

D01

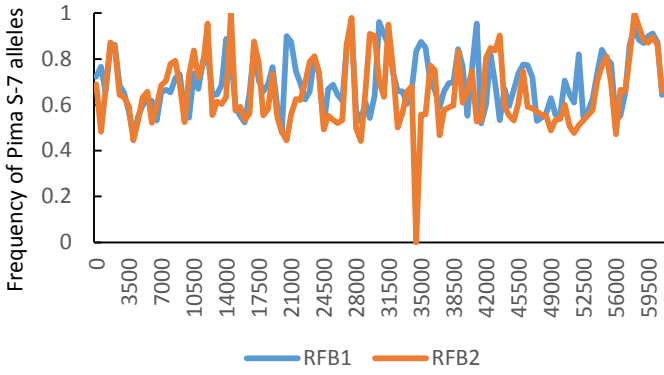

D02

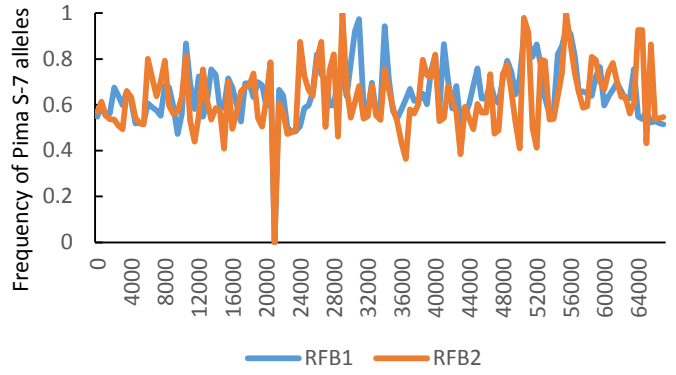

D03

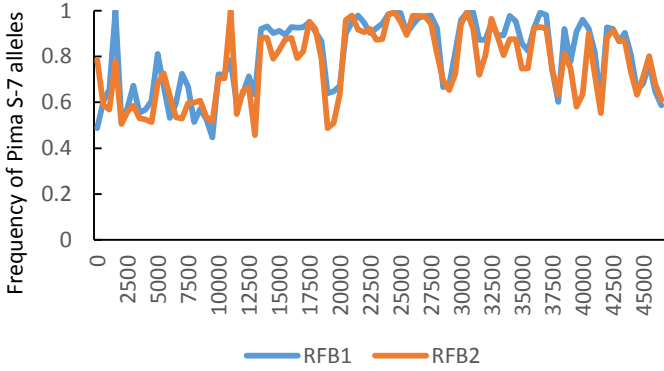

D04

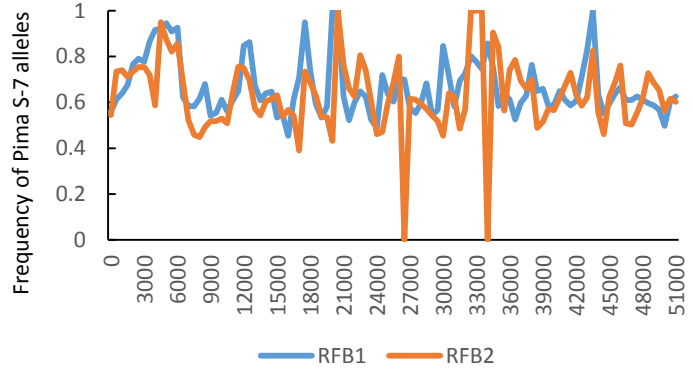

D05

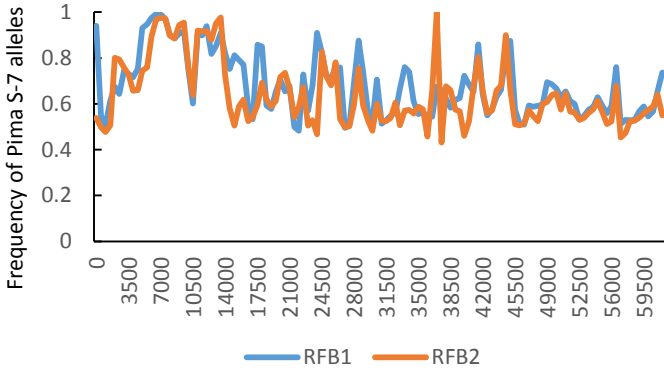

D06

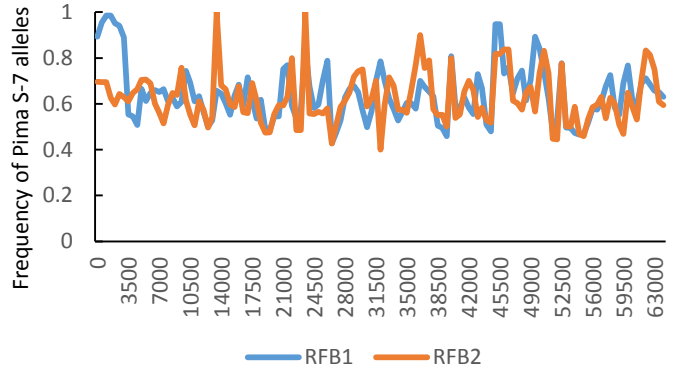

Locus IV D07

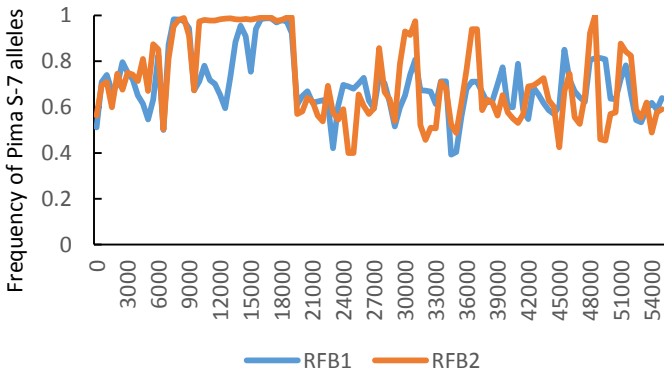

D08

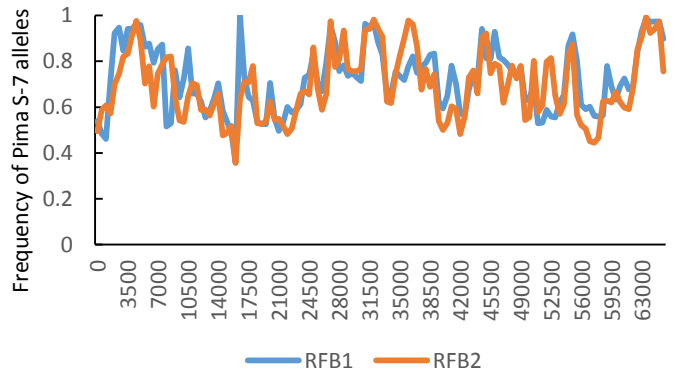

D09

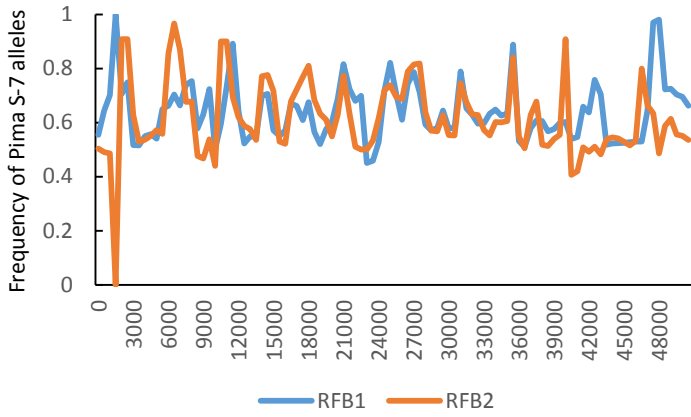

D10

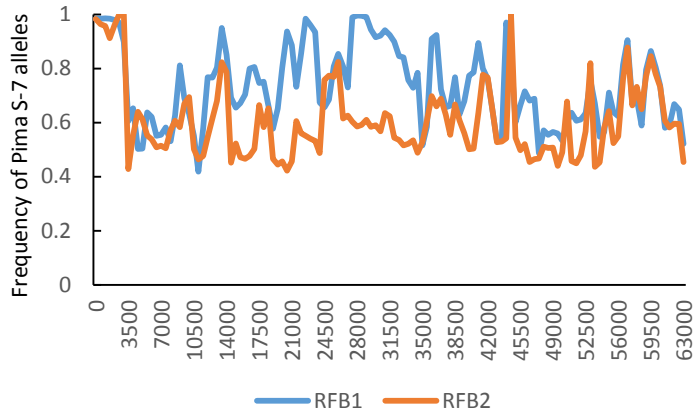

D11

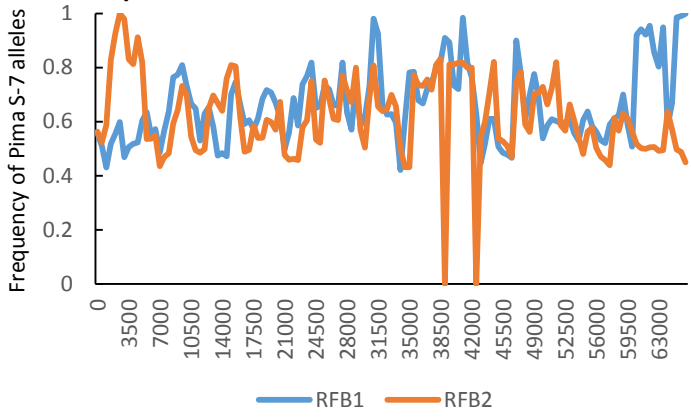

D12

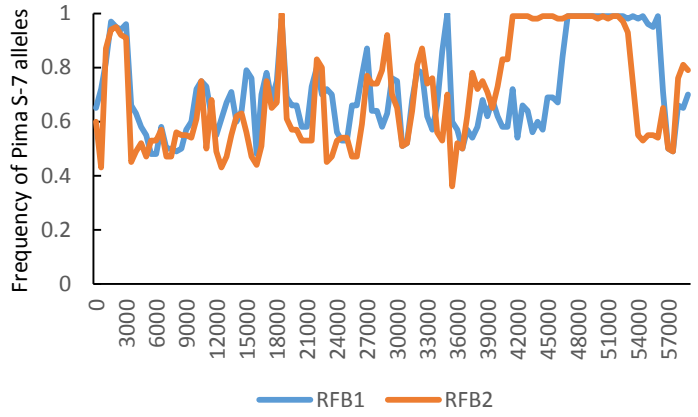

D13

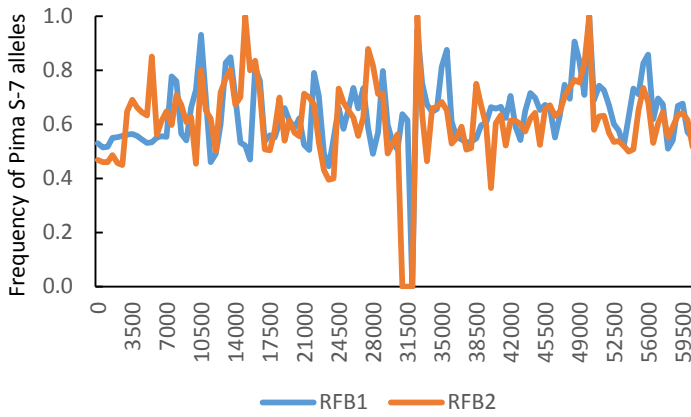

Supplement: erx459_suppl_supplementary_figure_s4.pdf [file erx459_suppl_supplementary_figure_s4.pdf]
