# Supplementary material for: Genetic dissection of the fuzzless seed trait in Gossypium barbadense
Source: PubMed Central journal article supplement (PMC6018843; doi:10.1093/jxb/erx459), 2018-01-17
Supplement: erx459_suppl_supplementary_figure_s2.pdf [file erx459_suppl_supplementary_figure_s2.pdf]

**Figure S2** Alignment of the coding sequences of *MYB25-like*. Genome-specific single nucleotide polymorphisms (SNPs) are highlighted in pink, the At or Dt sub-genome SNPs among TM-1, Sicala 40 and Pima S-7 are shown in red, SNPs between the At and A2 genome are shown in green, and SNPs between the Dt and D5 genome are shown in blue. Codons with SNPs that changed amino acids are underlined. In *MYB25-like\_Dt*, three nucleotides (positions 76, 419, and 965) differ between Pima S-7 and TM-1. Position 76 SNP does not change amino acid.

**(A) MYB25-like**

|                       |                                                                |    |
|-----------------------|----------------------------------------------------------------|----|
| Cotton A 06163        | ATGCAGCAGTCTCCATGTAGCGACAAGGTGGGGTTGAAGAAAGGGCCATGGACTCCAGAA   | 60 |
| Gh_A12G1503/Pima S-7  | ATGCAGCAGTCTCCATGTAGCGACAAGGTGGGGTTGAAGAAAGGGCCATGGACTCCAGAA   | 60 |
| Gh_A12G1503/TM-1      | ATGCAGCAGTCTCCATGTAGCGACAAGGTGGGGTTGAAGAAAGGGCCATGGACTCCAGAA   | 60 |
| Gh_A12G1503/Sicala 40 | ATGCAGCAGTCTCCATGTAGCGACAAGGTGGGGTTGAAGAAAGGGCCATGGACTCCAGAA   | 60 |
| Gorai.008G179600      | ATGCAGCAGTCTCCATGTAGCGACAAGGTGGGGTTGAAGAAAGGGCCATGGACTCCAGAA   | 60 |
| Gh_D12G1628/Pima S-7  | ATGCAGCAGTCTCCATGTAGCGACAAGGTGGTGTGTTGAAGAAAGGGCCATGGACTCCAGAA | 60 |
| Gh_D12G1628/TM-1      | ATGCAGCAGTCTCCATGTAGCGACAAGGTGGTGTGTTGAAGAAAGGGCCATGGACTCCAGAA | 60 |
| Gh_D12G1628/Sicala 40 | ATGCAGCAGTCTCCATGTAGCGACAAGGTGGTGTGTTGAAGAAAGGGCCATGGACTCCAGAA | 60 |

D12\_47603353, KASP marker for the MYB25-like\_Dt allele

|                       |                                                                |     |
|-----------------------|----------------------------------------------------------------|-----|
| Cotton A 06163        | GAAGACCAAAAACCTCTTGTCTTATATTC AAGAACACGGCGGTGGAAGCTGGCGAGGCTTG | 120 |
| Gh_A12G1503/Pima S-7  | GAAGACCAAAAACCTCTTGTCTTATATTC AAGAACACGGCGGTGGAAGCTGGCGAGGCTTG | 120 |
| Gh_A12G1503/TM-1      | GAAGACCAAAAACCTCTTGTCTTATATTC AAGAACACGGCGGTGGAAGCTGGCGAGGCTTG | 120 |
| Gh_A12G1503/Sicala 40 | GAAGACCAAAAACCTCTTGTCTTATATTC AAGAACACGGCGGTGGAAGCTGGCGAGGCTTG | 120 |
| Gorai.008G179600      | GAAGACCAAAAACCTCTTGTCTTATATTC AAGAACACGGCGGTGGAAGCTGGCGAGGCTTG | 120 |
| Gh_D12G1628/Pima S-7  | GAAGACCAAAAACCTCTTGTCTTATATTC AAGAACACGGCGGTGGAAGCTGGCGAGGCTTG | 120 |
| Gh_D12G1628/TM-1      | GAAGACCAAAAACCTCTTGTCTTATATTC AAGAACACGGCGGTGGAAGCTGGCGAGGCTTG | 120 |
| Gh_D12G1628/Sicala 40 | GAAGACCAAAAACCTCTTGTCTTATATTC AAGAACACGGCGGTGGAAGCTGGCGAGGCTTG | 120 |

|                       |                                                             |     |
|-----------------------|-------------------------------------------------------------|-----|
| Cotton A 06163        | CCCGCAAAGCTGGACTTCAAAGATGTGGCAAGAGTTGTAGACTTAGGTGGATTAACTAC | 180 |
| Gh_A12G1503/Pima S-7  | CCCGCAAAGCTGGACTTCAAAGATGTGGCAAGAGTTGTAGACTTAGGTGGATTAACTAC | 180 |
| Gh_A12G1503/TM-1      | CCCGCAAAGCTGGACTTCAAAGATGTGGCAAGAGTTGTAGACTTAGGTGGATTAACTAC | 180 |
| Gh_A12G1503/Sicala 40 | CCCGCAAAGCTGGACTTCAAAGATGTGGCAAGAGTTGTAGACTTAGGTGGATTAACTAC | 180 |
| Gorai.008G179600      | CCCGCAAAGCTGGACTTCAAAGATGTGGCAAGAGTTGTAGACTTAGGTGGATTAACTAC | 180 |
| Gh_D12G1628/Pima S-7  | CCCGCAAAGCTGGACTTCAAAGATGTGGCAAGAGTTGTAGACTTAGGTGGATTAACTAC | 180 |
| Gh_D12G1628/TM-1      | CCCGCAAAGCTGGACTTCAAAGATGTGGCAAGAGTTGTAGACTTAGGTGGATTAACTAC | 180 |
| Gh_D12G1628/Sicala 40 | CCCGCAAAGCTGGACTTCAAAGATGTGGCAAGAGTTGTAGACTTAGGTGGATTAACTAC | 180 |

|                       |                                                             |     |
|-----------------------|-------------------------------------------------------------|-----|
| Cotton A 06163        | TTAAGACCAGATATCAAAGAGGAAAGTTCAGTTCGCAGGAAGAACGAACCATCATTCAA | 240 |
| Gh_A12G1503/Pima S-7  | TTAAGACCAGATATCAAAGAGGAAAGTTCAGTTCGCAGGAAGAACGAACCATCATTCAA | 240 |
| Gh_A12G1503/TM-1      | TTAAGACCAGATATCAAAGAGGAAAGTTCAGTTCGCAGGAAGAACGAACCATCATTCAA | 240 |
| Gh_A12G1503/Sicala 40 | TTAAGACCAGATATCAAAGAGGAAAGTTCAGTTCGCAGGAAGAACGAACCATCATTCAA | 240 |
| Gorai.008G179600      | TTAAGACCAGATATCAAAGAGGAAAGTTCAGTTCGCAGGAAGAACGAACCATCATTCAA | 240 |
| Gh_D12G1628/Pima S-7  | TTAAGACCAGATATCAAAGAGGAAAGTTCAGTTCGCAGGAAGAACGAACCATCATTCAA | 240 |
| Gh_D12G1628/TM-1      | TTAAGACCAGATATCAAAGAGGAAAGTTCAGTTCGCAGGAAGAACGAACCATCATTCAA | 240 |
| Gh_D12G1628/Sicala 40 | TTAAGACCAGATATCAAAGAGGAAAGTTCAGTTCGCAGGAAGAACGAACCATCATTCAA | 240 |

|                       |                                                                |     |
|-----------------------|----------------------------------------------------------------|-----|
| Cotton A 06163        | CTCCAATGCCCTTCTTGGAAACAGGTGGTTCGGCTATTGCGGCTCATTTGCCAAAAAGAACA | 300 |
| Gh_A12G1503/Pima S-7  | CTCCAATGCCCTTCTTGGAAACAGGTGGTTCGGCTATTGCGGCTCATTTGCCAAAAAGAACA | 300 |
| Gh_A12G1503/TM-1      | CTCCAATGCCCTTCTTGGAAACAGGTGGTTCGGCTATTGCGGCTCATTTGCCAAAAAGAACA | 300 |
| Gh_A12G1503/Sicala 40 | CTCCAATGCCCTTCTTGGAAACAGGTGGTTCGGCTATTGCGGCTCATTTGCCAAAAAGAACA | 300 |
| Gorai.008G179600      | CTCCAATGCCCTTCTTGGAAACAGGTGGTTCGGCTATTGCGGCTCATTTGCCAAAAAGAACA | 300 |
| Gh_D12G1628/Pima S-7  | CTCCAATGCCCTTCTTGGAAACAGGTGGTTCGGCTATTGCGGCTCATTTGCCAAAAAGAACA | 300 |
| Gh_D12G1628/TM-1      | CTCCAATGCCCTTCTTGGAAACAGGTGGTTCGGCTATTGCGGCTCATTTGCCAAAAAGAACA | 300 |
| Gh_D12G1628/Sicala 40 | CTCCAATGCCCTTCTTGGAAACAGGTGGTTCGGCTATTGCGGCTCATTTGCCAAAAAGAACA | 300 |

Position 314, T in Xu142fl, KASP marker for MYB25-like\_At of Xu142fl

|                       |                                                              |     |
|-----------------------|--------------------------------------------------------------|-----|
| Cotton A 06163        | GACAATGAGATCAAGAACTACTGGAATACACAGTTGAAGAAAAGGTTGACGACGATAGGG | 360 |
| Gh_A12G1503/Pima S-7  | GACAATGAGATCAAGAACTACTGGAATACACAGTTGAAGAAAAGGTTGACGACGATAGGG | 360 |
| Gh_A12G1503/TM-1      | GACAATGAGATCAAGAACTACTGGAATACACAGTTGAAGAAAAGGTTGACGACGATAGGG | 360 |
| Gh_A12G1503/Sicala 40 | GACAATGAGATCAAGAACTACTGGAATACACAGTTGAAGAAAAGGTTGACGACGATAGGG | 360 |
| Gorai.008G179600      | GACAATGAGATCAAGAACTACTGGAATACACAGTTGAAGAAAAGGTTGACCAAGATAGGG | 360 |
| Gh_D12G1628/Pima S-7  | GACAATGAGATCAAGAACTACTGGAATACACAGTTGAAGAAAAGGTTGACCAAGATAGGG | 360 |
| Gh_D12G1628/TM-1      | GACAATGAGATCAAGAACTACTGGAATACACAGTTGAAGAAAAGGTTGACCAAGATAGGG | 360 |
| Gh_D12G1628/Sicala 40 | GACAATGAGATCAAGAACTACTGGAATACACAGTTGAAGAAAAGGTTGACCAAGATAGGG | 360 |

08g179600DtF5  
& MYB25L\_F

Cotton\_A\_06163 ATCGACCCTGCAACTCACAGGCTAAAACCGATACCCTCGGTTCAACTCCCAAGGATGCC 420  
Gh\_A12G1503/Pima S-7 ATCGACCCTGCAACTCACAGGCTAAAACCGATACCCTCGGTTCAACTCCCAAGGATGCC 420  
Gh\_A12G1503/TM-1 ATCGACCCTGCAACTCACAGGCTAAAACCGATACCCTCGGTTCAACTCCCAAGGATGCC 420  
Gh\_A12G1503/Sicala 40 ATCGACCCTGCAACTCACAGGCTAAAACCGATACCCTCGGTTCAACTCCCAAGGATGCC 420  
Gorai.008G179600 ATCGACCCTGCAACTCACAGGCTAAAACCGATACCCTCGGTTCAACTCCCAAGGATGCC 420  
Gh\_D12G1628/Pima S-7 ATCGACCCTGCAACTCACAGGCTAAAACCGATACCCTCGGTTCAACTCCCAAGGATGCC 420  
Gh\_D12G1628/TM-1 ATCGACCCTGCAACTCACAGGCTAAAACCGATACCCTCGGTTCAACTCCCAAGGATGCC 420  
Gh\_D12G1628/Sicala 40 ATCGACCCTGCAACTCACAGGCTAAAACCGATACCCTCGGTTCAACTCCCAAGGATGCC 420  
\*\*\*\*\*

08g179600\_R2

Cotton\_A\_06163 GCTAACCTTAGCCACATGGCTCAATGGGAGAGTGCTCGGTTAGAAGCTGAAGCTAGATTG 480  
Gh\_A12G1503/Pima S-7 GCTAACCTTAGCCACATGGCTCAATGGGAGAGTGCTCGGTTAGAAGCTGAAGCTAGATTG 480  
Gh\_A12G1503/TM-1 GCTAACCTTAGCCACATGGCTCAATGGGAGAGTGCTCGGTTAGAAGCTGAAGCTAGATTG 480  
Gh\_A12G1503/Sicala 40 GCTAACCTTAGCCACATGGCTCAATGGGAGAGTGCTCGGTTAGAAGCTGAAGCTAGATTG 480  
Gorai.008G179600 GCTAACCTTAGCCACATGGCTCAATGGGAGAGTGCTCGGTTAGAAGCTGAAGCTAGATTG 480  
Gh\_D12G1628/Pima S-7 GCTAACCTTAGCCACATGGCTCAATGGGAGAGTGCTCGGTTAGAAGCTGAAGCTAGATTG 480  
Gh\_D12G1628/TM-1 GCTAACCTTAGCCACATGGCTCAATGGGAGAGTGCTCGGTTAGAAGCTGAAGCTAGATTG 480  
Gh\_D12G1628/Sicala 40 GCTAACCTTAGCCACATGGCTCAATGGGAGAGTGCTCGGTTAGAAGCTGAAGCTAGATTG 480  
\*\*\*\*\*

Cotton\_A\_06163 GTGAGAGAGTCGAAACGAGTTTCAAACCCCTCCGCAAACCAATTTAGGTTACAGTCTTCA 540  
Gh\_A12G1503/Pima S-7 GTGAGAGAGTCGAAACGAGTTTCAAACCCCTCCGCAAACCAATTTAGGTTACAGTCTTCA 540  
Gh\_A12G1503/TM-1 GTGAGAGAGTCGAAACGAGTTTCAAACCCCTCCGCAAACCAATTTAGGTTACAGTCTTCA 540  
Gh\_A12G1503/Sicala 40 GTGAGAGAGTCGAAACGAGTTTCAAACCCCTCCGCAAACCAATTTAGGTTACAGTCTTCA 540  
Gorai.008G179600 GTGAGAGAGTCGAAACGAGTTTCAAACCCCTCCGCAAACCAATTTAGGTTACAGTCTTCA 540  
Gh\_D12G1628/Pima S-7 GTGAGAGAGTCGAAACGAGTTTCAAACCCCTCCGCAAACCAATTTAGGTTACAGTCTTCA 540  
Gh\_D12G1628/TM-1 GTGAGAGAGTCGAAACGAGTTTCAAACCCCTCCGCAAACCAATTTAGGTTACAGTCTTCA 540  
Gh\_D12G1628/Sicala 40 GTGAGAGAGTCGAAACGAGTTTCAAACCCCTCCGCAAACCAATTTAGGTTACAGTCTTCA 540  
\*\*\*\*\*

Cotton\_A\_06163 TCGGCTCCTCCACTGGTAAAGCAAATTTGATGTTGGTTGGCTCATGCTACTAAACCGCAA 600  
Gh\_A12G1503/Pima S-7 TCGGCTCCTCCACTGGTAAAGCAAATTTGATGTTGGTTGGCTCATGCTACTAAACCGCAA 600  
Gh\_A12G1503/TM-1 TCGGCTCCTCCACTGGTAAAGCAAATTTGATGTTGGTTGGCTCATGCTACTAAACCGCAA 600  
Gh\_A12G1503/Sicala 40 TCGGCTCCTCCACTGGTAAAGCAAATTTGATGTTGGTTGGCTCATGCTACTAAACCGCAA 600  
Gorai.008G179600 TCGGCTCCTCCACTGGTAAAGCAAATTTGATGTTGGTTGGCTCATGCTACTAAACCGCAA 600  
Gh\_D12G1628/Pima S-7 TCGGCTCCTCCACTGGTAAAGCAAATTTGATGTTGGTTGGCTCATGCTACTAAACCGCAA 600  
Gh\_D12G1628/TM-1 TCGGCTCCTCCACTGGTAAAGCAAATTTGATGTTGGTTGGCTCATGCTACTAAACCGCAA 600  
Gh\_D12G1628/Sicala 40 TCGGCTCCTCCACTGGTAAAGCAAATTTGATGTTGGTTGGCTCATGCTACTAAACCGCAA 600  
\*\*\*\*\*

Cotton\_A\_06163 TGCCTCGATGTACTCAAAGCTTGGCAACGTGTAGTCACTGGATTGTTCACTTTCAACACT 660  
Gh\_A12G1503/Pima S-7 TGCCTCGATGTACTCAAAGCTTGGCAACGTGTAGTCACTGGATTGTTCACTTTCAACACT 660  
Gh\_A12G1503/TM-1 TGCCTCGATGTACTCAAAGCTTGGCAACGTGTAGTCACTGGATTGTTCACTTTCAACACT 660  
Gh\_A12G1503/Sicala 40 TGCCTCGATGTACTCAAAGCTTGGCAACGTGTAGTCACTGGATTGTTCACTTTCAACACT 660  
Gorai.008G179600 TGCCTCGATGTACTCAAAGCTTGGCAACGTGTAGTCACTGGATTGTTCACTTTCAACACT 660  
Gh\_D12G1628/Pima S-7 TGCCTCGATGTACTCAAAGCTTGGCAACGTGTAGTCACTGGATTGTTCACTTTCAACACT 660  
Gh\_D12G1628/TM-1 TGCCTCGATGTACTCAAAGCTTGGCAACGTGTAGTCACTGGATTGTTCACTTTCAACACT 660  
Gh\_D12G1628/Sicala 40 TGCCTCGATGTACTCAAAGCTTGGCAACGTGTAGTCACTGGATTGTTCACTTTCAACACT 660  
\*\*\*\*\*

Cotton\_A\_06163 GACAACCTCCAATCTCCAACATCGACGTCGAGCTTCACGGAAAAACAAGTTACCAATCTCA 720  
Gh\_A12G1503/Pima S-7 GACAACCTCCAATCTCCAACATCGACGTCGAGCTTCACGGAAAAACAAGTTACCAATCTCA 720  
Gh\_A12G1503/TM-1 GACAACCTCCAATCTCCAACATCGACGTCGAGCTTCACGGAAAAACAAGTTACCAATCTCA 720  
Gh\_A12G1503/Sicala 40 GACAACCTCCAATCTCCAACATCGACGTCGAGCTTCACGGAAAAACAAGTTACCAATCTCA 720  
Gorai.008G179600 GACAACCTCCAATCTCCAACATCGACGTCGAGCTTCACGGAAAAACAAGTTACCAATCTCA 720  
Gh\_D12G1628/Pima S-7 GACAACCTCCAATCTCCAACATCGACGTCGAGCTTCACGGAAAAACAAGTTACCAATCTCA 720  
Gh\_D12G1628/TM-1 GACAACCTCCAATCTCCAACATCGACGTCGAGCTTCACGGAAAAACAAGTTACCAATCTCA 720  
Gh\_D12G1628/Sicala 40 GACAACCTCCAATCTCCAACATCGACGTCGAGCTTCACGGAAAAACAAGTTACCAATCTCA 720  
\*\*\*\*\*

Cotton\_A\_06163 TCTGTCCGTTTCATTGACAGCTTTGTGGGAACTCAAATAACAGCTGTTGCGGAAATAAT 780  
Gh\_A12G1503/Pima S-7 TCTGTCCGTTTCATTGACAGCTTTGTGGGAACTCAAATAACAGCTGTTGCGGAAATAAT 780  
Gh\_A12G1503/TM-1 TCTGTCCGTTTCATTGACAGCTTTGTGGGAACTCAAATAACAGCTGTTGCGGAAATAAT 780  
Gh\_A12G1503/Sicala 40 TCTGTCCGTTTCATTGACAGCTTTGTGGGAACTCAAATAACAGCTGTTGCGGAAATAAT 780  
Gorai.008G179600 TCTGTCCGTTTCATTGACAGCTTTGTGGGAACTCAAATAACAGCTGTTGCGGAAATAAT 780  
Gh\_D12G1628/Pima S-7 TCTGTCCGTTTCATTGACAGCTTTGTGGGAACTCAAATAACAGCTGTTGCGGAAATAAT 780  
Gh\_D12G1628/TM-1 TCTGTCCGTTTCATTGACAGCTTTGTGGGAACTCAAATAACAGCTGTTGCGGAAATAAT 780  
Gh\_D12G1628/Sicala 40 TCTGTCCGTTTCATTGACAGCTTTGTGGGAACTCAAATAACAGCTGTTGCGGAAATAAT 780  
\*\*\*\*\*

Cotton\_A\_06163 TGGGAATGTGTGGAGAAATCGAGCCAAGTTGCTGACTTACAGGAAAGATTGGATAACTCA 840  
Gh\_A12G1503/Pima S-7 TGGGAATGTGTGGAGAAATCGAGCCAAGTTGCTGACTTACAGGAAAGATTGGATAACTCA 840  
Gh\_A12G1503/TM-1 TGGGAATGTGTGGAGAAATCGAGCCAAGTTGCTGACTTACAGGAAAGATTGGATAACTCA 840  
Gh\_A12G1503/Sicala 40 TGGGAATGTGTGGAGAAATCGAGCCAAGTTGCTGACTTACAGGAAAGATTGGATAACTCA 840  
Gorai.008G179600 TGGGAATGTGTGGAGAAATCGAGCCAAGTTGCTGACTTACAGGAAAGATTGGATAACTCA 840  
Gh\_D12G1628/Pima S-7 TGGGAATGTGTGGAGAAATCGAGCCAAGTTGCTGACTTACAGGAAAGATTGGATAACTCA 840  
Gh\_D12G1628/TM-1 TGGGAATGTGTGGAGAAATCGAGCCAAGTTGCTGACTTACAGGAAAGATTGGATAACTCA 840  
Gh\_D12G1628/Sicala 40 TGGGAATGTGTGGAGAAATCGAGCCAAGTTGCTGACTTACAGGAAAGATTGGATAACTCA 840  
\*\*\*\*\*

Cotton\_A\_06163 ATGGGGTTGCATGACATATTGGATCTCTCCTCAGAAGATGTATGGTTTCAAGGCTCATA 900  
Gh\_A12G1503/Pima S-7 ATGGGGTTGCATGACATATTGGATCTCTCCTCAGAAGATGTATGGTTTCAAGGCTCATA 900  
Gh\_A12G1503/TM-1 ATGGGGTTGCATGACATATTGGATCTCTCCTCAGAAGATGTATGGTTTCAAGGCTCATA 900  
Gh\_A12G1503/Sicala 40 ATGGGGTTGCATGACATATTGGATCTCTCCTCAGAAGATGTATGGTTTCAAGGCTCATA 900  
Gorai.008G179600 ATGGGGTTGCATGACATATTGGATTTCTCCTCAGACGATGTATGGTTTCAAGGCTCATA 900  
Gh\_D12G1628/Pima S-7 ATGGGGTTGCATGACATATTGGATTTCTCCTCAGAAGATGTATGGTTTCAAGGCTCATA 900  
Gh\_D12G1628/TM-1 ATGGGGTTGCATGACATATTGGATTTCTCCTCAGAAGATGTATGGTTTCAAGGCTCATA 900  
Gh\_D12G1628/Sicala 40 ATGGGGTTGCATGACATATTGGATTTCTCCTCAGAAGATGTATGGTTTCAAGGCTCATA 900  
\*\*\*\*\*

Cotton\_A\_06163 AGGGCGGAAAATATGATGGAAGGGTATTCGGACACGTTAATGGTTTGTGATTCTGGGGAT 960  
Gh\_A12G1503/Pima S-7 AGGGCGGAAAATATGATGGAAGGGTATTCGGACACGTTAATGGTTTGTGATTCTGGGGAT 960  
Gh\_A12G1503/TM-1 AGGGCGGAAAATATGATGGAAGGGTATTCGGACACGTTAATGGTTTGTGATTCTGGGGAT 960  
Gh\_A12G1503/Sicala 40 AGGGCGGAAAATATGATGGAAGGGTATTCGGACACGTTAATGGTTTGTGATTCTGGGGAT 960  
Gorai.008G179600 AGGGCGGAAAATATGATGGAAGGGTATTCGGACACGTTAATGGTTTGTGATTCTGGGGAT 960  
Gh\_D12G1628/Pima S-7 AGGGCGGAAAATATGATGGAAGGGTATTCGGACACGTTAATGGTTTGTGATTCTGGGGAT 960  
Gh\_D12G1628/TM-1 AGGGCGGAAAATATGATGGAAGGGTATTCGGACACGTTAATGGTTTGTGATTCTGGGGAT 960  
Gh\_D12G1628/Sicala 40 AGGGCGGAAAATATGATGGAAGGGTATTCGGACACGTTAATGGTTTGTGATTCTGGGGAT 960  
\*\*\*\*\*

Cotton\_A\_06163 CATCCGAAGAGTTTGTCAATGGAGCCTAGACAAAACCTTAATGTTGGAACAAGTAATGCT 1020  
Gh\_A12G1503/Pima S-7 CATCCGAAGAGTTTGTCAATGGAGCCTAGACAAAACCTTAATGTTGGAACAAGTAATGCT 1020  
Gh\_A12G1503/TM-1 CATCCGAAGAGTTTGTCAATGGAGCCTAGACAAAACCTTAATGTTGGAACAAGTAATGCT 1020  
Gh\_A12G1503/Sicala 40 CATCCGAAGAGTTTGTCAATGGAGCCTAGACAAAACCTTAATGTTGGAACAAGTAATGCT 1020  
Gorai.008G179600 CATCCGAAGAGTTTGTCAATGGAGCCTAGACAAAACCTTAATGTTGGAACAAGTAATGCT 1020  
Gh\_D12G1628/Pima S-7 CATCCGAAGAGTTTGTCAATGGAGCCTAGACAAAACCTTAATGTTGGAACAAGTAATGCT 1020  
Gh\_D12G1628/TM-1 CATCCGAAGAGTTTGTCAATGGAGCCTAGACAAAACCTTAATGTTGGAACAAGTAATGCT 1020  
Gh\_D12G1628/Sicala 40 CATCCGAAGAGTTTGTCAATGGAGCCTAGACAAAACCTTAATGTTGGAACAAGTAATGCT 1020  
\*\*\*\*

Cotton\_A\_06163 AGTAGTTTCGAAGAAAACAAGAATTACTGGAACAACATCCTTAATTTTGCGAATGCTTCC 1080  
Gh\_A12G1503/Pima S-7 AGTAGTTTCGAAGAAAACAAGAATTACTGGAACAACATCCTTAATTTTGCGAATGCTTCC 1080  
Gh\_A12G1503/TM-1 AGTAGTTTCGAAGAAAACAAGAATTACTGGAACAACATCCTTAATTTTGCGAATGCTTCC 1080  
Gh\_A12G1503/Sicala 40 AGTAGTTTCGAAGAAAACAAGAATTACTGGAACAACATCCTTAATTTTGCGAATGCTTCC 1080  
Gorai.008G179600 AGTAGTTTCGAAGAAAACAAGAATTACTGGAACAACATCCTTAATTTTGCGAATGCTTCC 1080  
Gh\_D12G1628/Pima S-7 AGTAGTTTCGAAGAAAACAAGAATTACTGGAACAACATCCTTAATTTTGCGAATGCTTCC 1080  
Gh\_D12G1628/TM-1 AGTAGTTTCGAAGAAAACAAGAATTACTGGAACAACATCCTTAATTTTGCGAATGCTTCC 1080  
Gh\_D12G1628/Sicala 40 AGTAGTTTCGAAGAAAACAAGAATTACTGGAACAACATCCTTAATTTTGCGAATGCTTCC 1080  
\*\*\*\*\*

Cotton\_A\_06163 CCTTCTGGTTCTTCTGTCTTTTGA 1104  
Gh\_A12G1503/Pima S-7 CCTTCTGGTTCTTCTGTCTTTTGA 1104  
Gh\_A12G1503/TM-1 CCTTCTGGTTCTTCTGTCTTTTGA 1104  
Gh\_A12G1503/Sicala 40 CCTTCTGGTTCTTCTGTCTTTTGA 1104  
Gorai.008G179600 CCTTCTGGTTCTTCTGTCTTTTGA 1104  
Gh\_D12G1628/Pima S-7 CCTTCTGGTTCTTCTGTCTTTTGA 1104  
Gh\_D12G1628/TM-1 CCTTCTGGTTCTTCTGTCTTTTGA 1104  
Gh\_D12G1628/Sicala 40 CCTTCTGGTTCTTCTGTCTTTTGA 1104  
\*\*

(B)MYB25-like of Xu142 and Xu142fl (the SNP in MYB25-like\_At of Xu142 and Xu142fl is highlighted in pink)

```
Xu142_MYB25-like_Dt      ATGCAGCAGTCTCCATGTAGCGACAAGGTGGGGTTGAAGAAAGGCCATGGACTCCAGAA 60
Xu142fl_MYB25-like_Dt   ATGCAGCAGTCTCCATGTAGCGACAAGGTGGGGTTGAAGAAAGGCCATGGACTCCAGAA 60
Xu142_MYB25-like_At     ATGCAGCAGTCTCCATGTAGCGACAAGGTGGGGTTGAAGAAAGGCCATGGACTCCAGAA 60
Xu142fl_MYB25-like_At   ATGCAGCAGTCTCCATGTAGCGACAAGGTGGGGTTGAAGAAAGGCCATGGACTCCAGAA 60
*****

Xu142_MYB25-like_Dt      GAAGACCAAAAACCTCTGTCTTATATTCAAGAACACGGCGGTGGAAGCTGGCGCGGCTTG 120
Xu142fl_MYB25-like_Dt   GAAGACCAAAAACCTCTGTCTTATATTCAAGAACACGGCGGTGGAAGCTGGCGCGGCTTG 120
Xu142_MYB25-like_At     GAAGACCAAAAACCTCTGTCTTATATTCAAGAACACGGCGGTGGAAGCTGGCGAGGCTTG 120
Xu142fl_MYB25-like_At   GAAGACCAAAAACCTCTGTCTTATATTCAAGAACACGGCGGTGGAAGCTGGCGAGGCTTG 120
*****

Xu142_MYB25-like_Dt      CCCGCAAAGCTGGACTTCAAAGATGTGGCAAGAGTTGTAGACTTAGGTGGATTAACACTAC 180
Xu142fl_MYB25-like_Dt   CCCGCAAAGCTGGACTTCAAAGATGTGGCAAGAGTTGTAGACTTAGGTGGATTAACACTAC 180
Xu142_MYB25-like_At     CCCGCAAAGCTGGACTTCAAAGATGTGGCAAGAGTTGTAGACTTAGGTGGATTAACACTAC 180
Xu142fl_MYB25-like_At   CCCGCAAAGCTGGACTTCAAAGATGTGGCAAGAGTTGTAGACTTAGGTGGATTAACACTAC 180
*****

Xu142_MYB25-like_Dt      TTAAGACCAGATATCAAAGAGGAAAGTTCAGTTCGCAGGAAGAACGAACCATCATTCAA 240
Xu142fl_MYB25-like_Dt   TTAAGACCAGATATCAAAGAGGAAAGTTCAGTTCGCAGGAAGAACGAACCATCATTCAA 240
Xu142_MYB25-like_At     TTAAGACCAGATATCAAAGAGGAAAGTTCAGTTCGCAGGAAGAACGAACCATCATTCAA 240
Xu142fl_MYB25-like_At   TTAAGACCAGATATCAAAGAGGAAAGTTCAGTTCGCAGGAAGAACGAACCATCATTCAA 240
*****

Xu142_MYB25-like_Dt      CTCCATGCCCTTCTTGAAACAGGTGGTCGGCTATTGCGGCTCATTTGCCAAAAAGAACA 300
Xu142fl_MYB25-like_Dt   CTCCATGCCCTTCTTGAAACAGGTGGTCGGCTATTGCGGCTCATTTGCCAAAAAGAACA 300
Xu142_MYB25-like_At     CTCCATGCCCTTCTTGAAACAGGTGGTCGGCTATTGCGGCTCATTTGCCAAAAAGAACA 300
Xu142fl_MYB25-like_At   CTCCATGCCCTTCTTGAAACAGGTGGTCGGCTATTGCGGCTCATTTGCCAAAAAGAACA 300
*****

Position 314, KASP marker for MYB25-like_At of Xu142fl

Xu142_MYB25-like_Dt      GACAATGAGATCAAGAAGTACTGGAATACACAGTTGAAGAAAAGATTGACCAGATAGGG 360
Xu142fl_MYB25-like_Dt   GACAATGAGATCAAGAAGTACTGGAATACACAGTTGAAGAAAAGATTGACCAGATAGGG 360
Xu142_MYB25-like_At     GACAATGAGATCAAGAAGTACTGGAATACACAGTTGAAGAAAAGATTGACCAGATAGGG 360
Xu142fl_MYB25-like_At   GACAATGAGATCAAGAAGTACTGGAATACACAGTTGAAGAAAAGATTGACCAGATAGGG 360
*****

Xu142_MYB25-like_Dt      ATCGACCCTGCAACTCACAGGCCTAAAACCGATACCCTCGGTTCAACTCCCAAGGATGTC 420
Xu142fl_MYB25-like_Dt   ATCGACCCTGCAACTCACAGGCCTAAAACCGATACCCTCGGTTCAACTCCCAAGGATGTC 420
Xu142_MYB25-like_At     ATCGACCCTGCAACTCACAGGCCTAAAACCGATACCCTCGGTTCAACTCCCAAGGATGTC 420
Xu142fl_MYB25-like_At   ATCGACCCTGCAACTCACAGGCCTAAAACCGATACCCTCGGTTCAACTCCCAAGGATGTC 420
*****

Xu142_MYB25-like_Dt      GCTAACCTTAGCCACATGGCTCAATGGGAGAGTGTCTCGGTTAGAAGCTGAAGCTAGATTG 480
Xu142fl_MYB25-like_Dt   GCTAACCTTAGCCACATGGCTCAATGGGAGAGTGTCTCGGTTAGAAGCTGAAGCTAGATTG 480
Xu142_MYB25-like_At     GCTAACCTTAGCCACATGGCTCAATGGGAGAGTGTCTCGGTTAGAAGCTGAAGCTAGATTG 480
Xu142fl_MYB25-like_At   GCTAACCTTAGCCACATGGCTCAATGGGAGAGTGTCTCGGTTAGAAGCTGAAGCTAGATTG 480
*****

Xu142_MYB25-like_Dt      GTGAGAGAGTCGAAACGAGTTTCAAACCTTCGCAAAAACCAATTTAGGTTACAGTCTTCA 540
Xu142fl_MYB25-like_Dt   GTGAGAGAGTCGAAACGAGTTTCAAACCTTCGCAAAAACCAATTTAGGTTACAGTCTTCA 540
Xu142_MYB25-like_At     GTGAGAGAGTCGAAACGAGTTTCAAACCTTCGCAAAAACCAATTTAGGTTACAGTCTTCA 540
Xu142fl_MYB25-like_At   GTGAGAGAGTCGAAACGAGTTTCAAACCTTCGCAAAAACCAATTTAGGTTACAGTCTTCA 540
*****

Xu142_MYB25-like_Dt      TCTGCTCCTCCACTGGTAAACAAAATTGATGTTGGTTTGGCTCATGCTACTAAACCGCAA 600
Xu142fl_MYB25-like_Dt   TCTGCTCCTCCACTGGTAAACAAAATTGATGTTGGTTTGGCTCATGCTACTAAACCGCAA 600
Xu142_MYB25-like_At     TCGCTCCTCCACTGGTAAACAAAATTGATGTTGGTTTGGCTCATGCTACTAAACCGCAA 600
Xu142fl_MYB25-like_At   TCGCTCCTCCACTGGTAAACAAAATTGATGTTGGTTTGGCTCATGCTACTAAACCGCAA 600
*****

Xu142_MYB25-like_Dt      TGCCTCGATGTACTCAAAGCTTGGCAACGTGTAGTCACTGGATTGTTCACTTTCAACACT 660
Xu142fl_MYB25-like_Dt   TGCCTCGATGTACTCAAAGCTTGGCAACGTGTAGTCACTGGATTGTTCACTTTCAACACT 660
Xu142_MYB25-like_At     TGCCTCGATGTACTCAAAGCTTGGCAACGTGTAGTCACTGGATTGTTCACTTTCAACACT 660
Xu142fl_MYB25-like_At   TGCCTCGATGTACTCAAAGCTTGGCAACGTGTAGTCACTGGATTGTTCACTTTCAACACT 660
*****

Xu142_MYB25-like_Dt      GACAACCTCCAATCTCCAACATCGACGTCGAGCTTACGGAACACAGTTACCAATCTCA 720
Xu142fl_MYB25-like_Dt   GACAACCTCCAATCTCCAACATCGACGTCGAGCTTACGGAACACAGTTACCAATCTCA 720
Xu142_MYB25-like_At     GACAACCTCCAATCTCCAACATCGACGTCGAGCTTACGGAACACAGTTACCAATCTCA 720
Xu142fl_MYB25-like_At   GACAACCTCCAATCTCCAACATCGACGTCGAGCTTACGGAACACAGTTACCAATCTCA 720
*****

Xu142_MYB25-like_Dt      TCTGTCGGATTTCATTGACAGCTTTGTGGGGAACCTCAAATAACAGCTGTTGCGGAAATAAT 780
Xu142fl_MYB25-like_Dt   TCTGTCGGATTTCATTGACAGCTTTGTGGGGAACCTCAAATAACAGCTGTTGCGGAAATAAT 780
Xu142_MYB25-like_At     TCTGTCGGATTTCATTGACAGCTTTGTGGGGAACCTCAAATAACAGCTGTTGCGGAAATAAT 780
Xu142fl_MYB25-like_At   TCTGTCGGATTTCATTGACAGCTTTGTGGGGAACCTCAAATAACAGCTGTTGCGGAAATAAT 780
*****

Xu142_MYB25-like_Dt      TGGGAATGTGTGGAGAAATCGAGCCAAGTTGCTGAGTTACAGGAAAGATTGGATAACTCA 840
Xu142fl_MYB25-like_Dt   TGGGAATGTGTGGAGAAATCGAGCCAAGTTGCTGAGTTACAGGAAAGATTGGATAACTCA 840
Xu142_MYB25-like_At     TGGGAATGTGTGGAGAAATCGAGCCAAGTTGCTGAGTTACAGGAAAGATTGGATAACTCA 840
Xu142fl_MYB25-like_At   TGGGAATGTGTGGAGAAATCGAGCCAAGTTGCTGAGTTACAGGAAAGATTGGATAACTCA 840
*****
```

Xu142\_MYB25-like\_Dt ATGGGGTTGCATGACATATTGGAT**T**TCCTCCAGAAAGATGTATGGTTTCAAGGCTCATA 900  
Xu142fl\_MYB25-like\_Dt ATGGGGTTGCATGACATATTGGAT**T**TCCTCCAGAAAGATGTATGGTTTCAAGGCTCATA 900  
Xu142\_MYB25-like\_At ATGGGGTTGCATGACATATTGGAT**C**TCCTCCAGAAAGATGTATGGTTTCAAGGCTCATA 900  
Xu142fl\_MYB25-like\_At ATGGGGTTGCATGACATATTGGAT**C**TCCTCCAGAAAGATGTATGGTTTCAAGGCTCATA 900  
\*\*\*\*\*

Xu142\_MYB25-like\_Dt AGGGCGGAAAATATGATGGAAGGGTATTCGGACACGTTAATGGTTTGTGATTCTGGGGAT 960  
Xu142fl\_MYB25-like\_Dt AGGGCGGAAAATATGATGGAAGGGTATTCGGACACGTTAATGGTTTGTGATTCTGGGGAT 960  
Xu142\_MYB25-like\_At AGGGCGGAAAATATGATGGAAGGGTATTCGGACACGTTAATGGTTTGTGATTCTGGGGAT 960  
Xu142fl\_MYB25-like\_At AGGGCGGAAAATATGATGGAAGGGTATTCGGACACGTTAATGGTTTGTGATTCTGGGGAT 960  
\*\*\*\*\*

Xu142\_MYB25-like\_Dt CAT**C**AGAAGAGTTTGTCAATGGAGCCTAGACAAAACCTTAATGTTGGAACAAGTAATGCT 1020  
Xu142fl\_MYB25-like\_Dt CAT**C**AGAAGAGTTTGTCAATGGAGCCTAGACAAAACCTTAATGTTGGAACAAGTAATGCT 1020  
Xu142\_MYB25-like\_At CAT**C**AGAAGAGTTTGTCAATGGAGCCTAGACAAAACCTTAATGTTGGAACAAGTAATGCT 1020  
Xu142fl\_MYB25-like\_At CAT**C**AGAAGAGTTTGTCAATGGAGCCTAGACAAAACCTTAATGTTGGAACAAGTAATGCT 1020  
\*\*\* \*\*\*\*\*

Xu142\_MYB25-like\_Dt AGTAGTTTCGAAGAAAACAAGAATTACTGGAACAACATCCTTAATTTGCGAATGCTTCC 1080  
Xu142fl\_MYB25-like\_Dt AGTAGTTTCGAAGAAAACAAGAATTACTGGAACAACATCCTTAATTTGCGAATGCTTCC 1080  
Xu142\_MYB25-like\_At AGTAGTTTCGAAGAAAACAAGAATTACTGGAACAACATCCTTAATTTGCGAATGCTTCC 1080  
Xu142fl\_MYB25-like\_At AGTAGTTTCGAAGAAAACAAGAATTACTGGAACAACATCCTTAATTTGCGAATGCTTCC 1080  
\*\*\*\*\*

Xu142\_MYB25-like\_Dt CC**A**TCTGGTTCTTCTGTCTTTTGA 1104  
Xu142fl\_MYB25-like\_Dt CC**A**TCTGGTTCTTCTGTCTTTTGA 1104  
Xu142\_MYB25-like\_At CC**T**TCTGGTTCTTCTGTCTTTTGA 1104  
Xu142fl\_MYB25-like\_At CC**T**TCTGGTTCTTCTGTCTTTTGA 1104  
\*\* \*\*\*\*\*
