# Supplementary material for: Genetic dissection of the fuzzless seed trait in Gossypium barbadense
Source: PubMed Central journal article supplement (PMC6018843; doi:10.1093/jxb/erx459), 2018-01-17
Supplement: erx459_suppl_supplementary_figure_s8.pdf [file erx459_suppl_supplementary_figure_s8.pdf]

**Figure S8 Alignment of the promoter sequences of MYB25-like.**

*cis*-acting regulatory elements are underlined and color-coded. MYB binding sites: blue; elements involved in light responsiveness: red; gibberellin-responsive element: black; elements involved in MeJA-responsiveness: green; elements involved in salicylic acid responsiveness: orange. Bases 1-421 of P\_Pima S-7\_At and P\_Sicala 40\_At were aligned to chromosome Ca5 of *G. arboreum* rather than chromosome Ca9, on which the A2 genome *MYB25-like* (Cotton-A-06163) was located. Differences between P\_Pima S-7\_Dt and P\_Sicala 40\_Dt as well as P\_TM-1\_Dt are highlighted in yellow and boxed, including three SNPs (one in a putative light responsive element located within the core promoter region and another in a MYB-domain binding site), two small indel (1-bp deletion or insertion), and two deletions that contain two putative light responsive elements.

|               |                                                                 |     |
|---------------|-----------------------------------------------------------------|-----|
| P_A2          | --TGAGATACCAATTTTGGGCGTCGCGAGGGTG--CTAATAACTTCTCGCGGTAAC        | 56  |
| P_PimaS-7_At  | TTTGAAGGGATTTTGTGTTTGTCTCATTTTTCAATCTTTGTAAAAATCCCCCCTTACAT     | 60  |
| P_Sicala40_At | TTTGAAGGGATTTTGTGTTTGTCTCATTTTTCAATCTTTGTAAAAATCCCCCCTTACAT     | 60  |
| P_TM-1_At     | TTTGAAGGGATTTTGTGTTTGTCTCATTTTTCAATCTTTGTAAAAATCCCCCCTTACAT     | 60  |
| P_D5          | ---AAGGAAAAAAAAAAG-----GAAATCTAAACAAAACAATTTTAA                 | 40  |
| P_PimaS-7 Dt  | -----AGGGAAAAAAAAAG-----GAAATCAAACAAAACAATTTTAA                 | 38  |
| P_Sicala40 Dt | -----AGGGAAAAAAAAAG-----GAAATCAAACAAAACAATTTTAA                 | 38  |
| P_TM-1 Dt     | -----AGGGAAAAAAAAAG-----GAAATCAAACAAAACAATTTTAA                 | 38  |
|               | * * * *                                                         |     |
| P_A2          | ACTCCCGAACCCCAATTTTCTCTGGACTTTCACGTAGACCTAAAT--TTAGCCTTCTT      | 113 |
| P_PimaS-7 At  | GATTTTGAATGGCTTTTATAGC-CATCTTTTACATGATTTTCTATTATTTCTTTTCTA      | 119 |
| P_Sicala40 At | GATTTTGAATGGCTTTTATAGC-CATCTTTTACATGATTTTCTATTATTTCTTTTCTA      | 119 |
| P_TM-1_At     | GATTTTGAATGGCTTTTATAGC-CATCTTTTACATGATTTTCTATTATTTCTTTTCTA      | 119 |
| P_D5          | GATGTAATAATGTCTTTTTTGTGCTACTTTTTTTTTATAAATAATTTTATTATGATGTTATA  | 100 |
| P_PimaS-7 Dt  | GATGTAATAATGTCTTTTTTGTGCTACTTTTTTTTTATAAATAATTTTATTATGATGTTATA  | 98  |
| P_Sicala40 Dt | GATGTAATAATGTCTTTTTTGTGCTACTTTTTTTTTATAAATAATTTTATTATGATGTTATA  | 98  |
| P_TM-1 Dt     | GATGTAATAATGTCTTTTTTGTGCTACTTTTTTTTTATAAATAATTTTATTATGATGTTATA  | 98  |
|               | * ** * *** ** * * ** *                                          |     |
| P_A2          | TTTGTFT-----TAAATAATTTTATTAGGTGTCGATCACAACATAA-----             | 157 |
| P_PimaS-7 At  | TTTTGTAGGTGGTGGTGGTAGACAATGGATA TCAAAAATGGG-----AGAAAAATGGGG    | 174 |
| P_Sicala40 At | TTTTGTAGGTGGTGGTGGTAGACAATGGATA TCAAAAATGGG-----AGAAAAATTTT-    | 173 |
| P_TM-1 At     | TTTTGTAGGTGGTGGTGGTAGACAATGGATA TCAAAAATGGG-----AGAAAAATTTT-    | 173 |
| P_D5          | ATTGTA-AAACTTTTATTATGAACAATCACCTTTGCATATTCTATCCAAACAAAATAAATA   | 159 |
| P_PimaS-7 Dt  | ATTGTTAAACTTTTATTATGAACAATCACCTTTGCATATTCTATCCAAACAAAATAAATA    | 158 |
| P_Sicala40 Dt | ATTGTTAAACTTTTATTATGAACAATCACCTTTGCATATTCTATCCAAACAAAATAAATA    | 158 |
| P_TM-1 Dt     | ATTGTTAAACTTTTATTATGAACAATCACCTTTGCATATTCTATCCAAACAAAATAAATA    | 158 |
|               | ** * * * * * * * *                                              |     |
| P_A2          | AAA-AGGATCGGTGGCGAC-----TCCTTTGTAAATAAAAATCGAAAGTTT             | 202 |
| P_PimaS-7 At  | CAAGTGGGAAAGTGGCTAG--GTGGCTAGGGTTTCTTGGTTT-----TTT              | 217 |
| P_Sicala40 At | -----                                                           | 173 |
| P_TM-1 At     | -----                                                           | 173 |
| P_D5          | AAATTACTTAATTTTCTTTTCTTCTACTACTTTTTAGTGTTTAAATAAGATAATAAATAT    | 219 |
| P_PimaS-7 Dt  | AAATTACTTAATTTTCTTTTCTTCTACTACTTTTTAGTGTTTAAATAAGATAATAAATAT    | 218 |
| P_Sicala40 Dt | AAATTACTTAATTTTCTTTTCTTCTACTACTTTTTAGTGTTTAAATAAGATAATAAATAT    | 218 |
| P_TM-1 Dt     | AAATTACTTAATTTTCTTTTCTTCTACTACTTTTTAGTGTTTAAATAAGATAATAAATAT    | 218 |
|               | * * * * * * * *                                                 |     |
| P_A2          | GTTTTCAAATGT---TTAATAAATCGCCACAATTAGCGACCAAGCAAAAACAAAATTTT     | 259 |
| P_PimaS-7 At  | TTTTGGGGTTAGTTTTTTTTTTTTTTTTTTTTTTTTTGGGTT-TAGGTTTTTGGGGGAGGCTT | 276 |
| P_Sicala40_At | -----TCTTTTTTTTTTATTTTTTTGGGT-TAGGTTTTTGGGGGAGGCTT              | 216 |
| P_TM-1_At     | -----TCTTTTTTTTTTATTTTTTTGGGT-TAGGTTTTTGGGGGAGGCTT              | 216 |
| P_D5          | TATTTACTTTCTTTTTCTTTGCTTTCCTATCTTTAATT-CAAACAT-A-----           | 266 |
| P_PimaS-7 Dt  | TATTTACTTTATTTTTCTTTGCTTTCCTATCTTTAATT-CAAACAT-AGTAGAGGTGTT     | 276 |
| P_Sicala40 Dt | TATTTACTTTATTTTTCTTTGCTTTCCTATCTTTAATT-CACACAT-AGTAGAGGTGTT     | 276 |
| P_TM-1 Dt     | TATTTACTTTATTTTTCTTTGCTTTCCTATCTTTAATT-CACACAT-AGTAGA-----      | 270 |
|               | * * * ** *                                                      |     |
| P_A2          | TTTACGTCG--CTACAA--GAACATTTAAATATTTT-----GC                     | 293 |
| P_PimaS-7_At  | AATGGGCTTTTGAATG-----GGTTAATATTTGGGTTTGTAAATGGGTTTGGGTAGA       | 330 |
| P_Sicala40_At | AATGGGCTTTTGAATG-----GGTTAATATTTGGGTTTGTAAATGGGTTTGGGTAGA       | 270 |
| P_TM-1_At     | AATGGGCTTTTGAATG-----GGTTAATATTTGGGTTTGTAAATGGGTTTGGGTAGA       | 270 |
| P_D5          | -----                                                           | 266 |
| P_PimaS-7 Dt  | TATGGGTTGGGCGGCTC-----                                          | 293 |
| P_Sicala40 Dt | TATGGGTTGGGCGGCTCGGCCCTGCTTTCCTATCTTTAATTCAAACAT----AGTAGAGG    | 332 |
| P_TM-1 Dt     | -----                                                           | 272 |

|               |                                                                      |     |
|---------------|----------------------------------------------------------------------|-----|
| P_A2          | TATTTATATATTTAAAAACAATAAAAAATCATTTTAACTCAATAAATTTATAATTTGAT          | 353 |
| P_PimaS-7_At  | TGTAATGGGTCA-----TGGGTTAAGGGTTTTAGTGGGTTTTGAGGTTTGGTGGGT             | 384 |
| P_Sicala40_At | TGTAATGGGTCA-----TGGGTTAAGGGTTTTAGTGGGTTTTGAGGTTTGGTGGGT             | 324 |
| P_TM-1_At     | TGTAATGGGTCA-----TGGGTTAAGGGTTTTAGTGGGTTTTGAGGTTTGGTGGGT             | 324 |
| P_D5          | -----                                                                | 266 |
| P_PimaS-7_Dt  | -----GGCCCGGCC <b>CAATAC</b> CCGCGCGAAATATGGAAGGATTT                 | 332 |
| P_Sicala40_Dt | TGTTTATGGGTGGGGCGGCTGGCCCGGCC <b>CAACAG</b> CCGCGCGAAATATGGAAGGTT    | 391 |
| P_TM-1_Dt     | TGTTTATGGGTGGGGCGGCTGGCCCGGCC <b>CAACAG</b> CCGCGCGAAATATGGAAGGTT    | 331 |
|               |                                                                      |     |
| P_A2          | ATCTTTTTATTACAACCTCGTTAT-----AATTTTTTTTACTCTATCCTTT                  | 399 |
| P_PimaS-7_At  | TTGATATAATGGGCCCGGGCAATTTGGGCTTCTACAGAGTATCTCTTGCTT-----             | 436 |
| P_Sicala40_At | TTGATATAATCGGGCCCGGGCAATTTGGGCTTCTACAGAGTATCTCTTGCTT-----            | 376 |
| P_TM-1_At     | TTGATATAATCGGGCCCGGGCAATTTGGGCTTCTACAGAGTATCTCTTGCTT-----            | 376 |
| P_D5          | -----                                                                | 266 |
| P_PimaS-7_Dt  | TGGATAAAAAATATAGGCCCGAAAT-----                                       | 356 |
| P_Sicala40_Dt | TGGATAAAAAATATAGGCCCGAAATATGGGCTCGGGCACCACCTTTTTTGCCTGAGCCCGG        | 451 |
| P_TM-1_Dt     | TGGATAAAAAATATAGGCCCGAAATATGGGCTCGGGCACCACCTTTTTTGCCTGAGCCCGG        | 391 |
|               |                                                                      |     |
| P_A2          | ATCATAAATATCAAAATGAGTATCTCTTGCTTTCCTTGAAAAGTTAAATTTTTTATTAT          | 459 |
| P_PimaS-7_At  | ---TCCTTGAAAAGT-----TAAAT-----TTTTTATTAT                             | 464 |
| P_Sicala40_At | ---TCCTTGAAAAGT-----TAAAT-----TTTTTATTAT                             | 404 |
| P_TM-1_At     | ---TCCTTGAAAAGT-----TAAAT-----TTTTTATTAT                             | 404 |
| P_D5          | -----                                                                | 266 |
| P_PimaS-7_Dt  | -----ATGGGCTCGGGCACCACCTTTTTTTG                                      | 381 |
| P_Sicala40_Dt | C-CCGGCCCGATATAA-----TACATATATTTGGGCTCGGGCACCACCTTTTTTTG             | 500 |
| P_TM-1_Dt     | -----                                                                | 391 |
|               |                                                                      |     |
| P_A2          | CCCGATTCAAGAGAAGTTAAAGAAAGGAAAAAGAAAATCAAACAAAACAACCTTTTAAAG         | 519 |
| P_PimaS-7_At  | CCCGATTCAAGAGAAGTTAAAGAAAGGAAAAAGAAAATCAAACAAAACAACCTTTTAAAG         | 524 |
| P_Sicala40_At | CCCGATTCAAGAGAAGTTAAAGAAAGGAAAAAGAAAATCAAACAAAACAACCTTTTAAAG         | 464 |
| P_TM-1_At     | CCCGATTCAAGAGAAGTTAAAGAAAGGAAAAAGAAAATCAAACAAAACAACCTTTTAAAG         | 464 |
| P_D5          | -----                                                                | 266 |
| P_PimaS-7_Dt  | CCCGAGCCCGCCCGCCCGATATA--ATAAATATATTTATTTTTTAAATTTTTTTAAT            | 439 |
| P_Sicala40_Dt | CCCGAGCCCGCCCGCCCGATATA--ATAAATATATTTATTTTTTAAATTTTTTTAAT            | 558 |
| P_TM-1_Dt     | -----CCCGCCCGATATA--ATAAATATATTTATTTTTTAAATTTTTTTAAT                 | 438 |
|               |                                                                      |     |
| P_A2          | TGTATAATGTCTTTTTT-----GTCAAC                                         | 542 |
| P_PimaS-7_At  | TGTATAATGTCT-----TTTT-----TGICAA                                     | 546 |
| P_Sicala40_At | TGTATAATGTCT-----TTTT-----TGICAA                                     | 486 |
| P_TM-1_At     | TGTATAATGTCT-----TTTT-----TGICAA                                     | 486 |
| P_D5          | -----                                                                | 266 |
| P_PimaS-7_Dt  | TTTAAATATTTTTTAAATACTTTTTTATTATTTTTTAAATTTTTTAAATTTTTTAAATA          | 499 |
| P_Sicala40_Dt | TTTAAATATTTTTTAAATACTTTTTTATTATTTTTTAAATTTTTTAAATTTTTTAAATA          | 618 |
| P_TM-1_Dt     | TTTAAATATTTTTTAAATACTTTTTTATTATTTTTTAAATTTTTTAAATTTTTTAAATA          | 498 |
|               |                                                                      |     |
| P_A2          | TTTTTTTTTTTTTATAAATAATTTTATGATGACGTTATAATTGTAAAACCTTATTATGA          | 602 |
| P_PimaS-7_At  | CTTT--TT--TTTTATAAATAATTTTATGATGACGTTATAATTGTAAAACCTTATTATGA         | 602 |
| P_Sicala40_At | CTTT--TTTTTTTTTATAAATAATTTTATGATGACGTTATAATTGTAAAACCTTATTATGA        | 544 |
| P_TM-1_At     | CTTT--TTTTTTTTTATAAATAATTTTATGATGACGTTATAATTGTAAAACCTTATTATGA        | 544 |
| P_D5          | -----                                                                | 266 |
| P_PimaS-7_Dt  | CTTTTTTTAATTTTTTAAATAAATTTTGGTATT--TATTAATAAATGGGCCGAGTCCG <b>AG</b> | 557 |
| P_Sicala40_Dt | CTTTTTTTAATTTTTTAAATAAATTTTGGTATT--TATTAATAAATGGGCCGAGTCCG <b>GG</b> | 676 |
| P_TM-1_Dt     | CTTTTTTTAATTTTTTAAATAAATTTTGGTATT--TATTAATAAATGGGCCGAGTCCG <b>GS</b> | 556 |
|               |                                                                      |     |
| P_A2          | ACAATCATTTCCTTTGCATATCTATCCAAACAAAAT-AAATAAATAAATACTTAATTTTCT        | 661 |
| P_PimaS-7_At  | ACAATCATTTCCTTTGCATATCTATCCAAACA-AAATAAATAAATACTTAATTTTCT            | 661 |
| P_Sicala40_At | ACAATCATTTCCTTTGCATATCTATCCAAACA-AAATAAATAAATACTTAATTTTCT            | 603 |
| P_TM-1_At     | ACAATCATTTCCTTTGCATATCTATCCAAACA-AAATAAATAAATACTTAATTTTCT            | 603 |
| P_D5          | -----                                                                | 266 |
| P_PimaS-7_Dt  | CCAGGCCTGGGCTTATGCTTTTTTCCCGGGCCGGGCTGGGCAAAATTTTAGGCCCATAT          | 617 |
| P_Sicala40_Dt | CCAGGCCTGGGCTTATGCTTTTTTCCCGGGCCGGGCTGGGCAAAATTTTAGGCCCATAT          | 736 |
| P_TM-1_Dt     | CCAGGCCTGGGCTTATGCTTTTTTCCCGGGCCGGGCTGGGCAAAATTTTAGGCCCATAT          | 616 |

MYB binding site differs between Pima S-7 and Sicala 40

P\_A2 TTTC-----CTTCACTAATTTTTAGTGTTTAAA----- 689  
P\_PimaS-7\_At TTTC-----CTTCACTAATTTTTAGTGTTTAAAATAAGA 694  
P\_Sicala40\_At TTTC-----CTTCACTAATTTTTAGTGTTTAAAATAAGA 636  
P\_TM-1\_At TTTC-----CTTCACTAATTTTTAGTGTTTAAAATAAGA 636  
P\_D5 ----- 266  
P\_PimaS-7\_Dt TTTGGGCCGGGCCGGGGCCAGGACCGGGCCAAATTTTATGGGCCGGGCCA 676  
P\_Sicala40\_Dt TTTGGGCCGGGCCGGGGCCAGGACTCGGGCCAAATTTTATGGGCCGGGCCA 796  
P\_TM-1\_Dt TTTGGGCCGGGCCGGGGCCAGGACTCGGGCCAAATTTTATGGGCCGGGCCA 676

P\_A2 -----TAAGATAATAAATATTTTTACTTTCTTTTTCTTTGCTTTCCTA 734  
P\_PimaS-7\_At T-----AATAAATATTTACTTTCTTTTTCTTTGCTTTCCTA 734  
P\_Sicala40\_At T-----AATAAATATTTACTTTCTTTTTCTTTGCTTTCCTA 676  
P\_TM-1\_At T-----AATAAATATTTACTTTCTTTTTCTTTGCTTTCCTA 676  
P\_D5 ----- 266  
P\_PimaS-7\_Dt AACCCAGCCCGGCCCGGGCCAAACCCAGCCCGGCCGCGCCGAACCCGGCCCGGCCATG 736  
P\_Sicala40\_Dt AACCCAGCCCGGCCCGGGCCAAACCCAGCCCGGCCGCGCCGAACCCGGCCCGGCCATG 856  
P\_TM-1\_Dt AACCCAGCCCGGCCCGGGCCAAACCCAGCCCGGCCGCGCCGAACCCGGCCCGGCCATG 736

P\_A2 TCTTTAATTCAAACATAGTGTAGAAAAGAAAATTAATTTCTTAAAGAAGGGTATAATGG 794  
P\_PimaS-7\_At TCTTTAATTCAAACATAGTGTAGAAAAGAAAATTAATTTCTTAAAGAAGGGTATAATGG 794  
P\_Sicala40\_At TCTTTAATTCAAACATAGTGTAGAAAAGAAAATTAATTTCTTAAAGAAGGGTATAATGG 736  
P\_TM-1\_At TCTTTAATTCAAACATAGTGTAGAAAAGAAAATTAATTTCTTAAAGAAGGGTATAATGG 736  
P\_D5 -----GTGTAGAAAAGAAAATTAATTTCTTAAAGAAGGGTATAATGG 309  
P\_PimaS-7\_Dt AGCACCTCTAAACATAGTGTAGAAAAGAAAATTAATTTCTTAAAGAAGGGTATAATGG 796  
P\_Sicala40\_Dt AGCACCTCTAAACATAGTGTAGAAAAGAAAATTAATTTCTTAAAGAAGGGTATAATGG 916  
P\_TM-1\_Dt AGCACCTCTAAACATAGTGTAGAAAAGAAAATTAATTTCTTAAAGAAGGGTATAATGG 796  
\*\*\*\*\* \* \*\*\*\*\* \* \*\*\*\*\*

P\_A2 TCATATAGGCTTATGCAATATTTATTAACACTGTAAGCCTATAAAACGCAGTTATATATC 854  
P\_PimaS-7\_At TCATATAGGCTTATGCAATATTTATTAACACTGTAAGCCTATAAAACGCAGTTATATATC 854  
P\_Sicala40\_At TCATATAGGCTTATGCAATATTTATTAACACTGTAAGCCTATAAAACGCAGTTATATATC 796  
P\_TM-1\_At TCATATAGGCTTATGCAATATTTATTAACACTGTAAGCCTATAAAACGCAGTTATATATC 796  
P\_D5 TCATATAGGCTTAAAGTAATATTTAT-TACACTGTAAGCCTATAAAACGCAGTTATATATC 368  
P\_PimaS-7\_Dt TCATATAGGCTTAAAGTAATATTTAT-TAGACTGTAAGCCTATAAAACGCAGTTATATATC 855  
P\_Sicala40\_Dt TCATATAGGCTTAAAGTAATATTTAT-TAGACTGTAAGCCTATAAAACGCAGTTATATATC 975  
P\_TM-1\_Dt TCATATAGGCTTAAAGTAATATTTAT-TAGACTGTAAGCCTATAAAACGCAGTTATATATC 855  
\*\*\*\*\* \* \*\*\*\*\* \* \*\*\*\*\*

P\_A2 TACTTTAAATTAACCAACTCTACCCACATTTTCGTTGCTTTCAACTGCGTATAATCTCTC 914  
P\_PimaS-7\_At TACTTTAAATTAACCAACTCTACCCACATTTTCGTTGCTTTCAACTGCGTATAATCTCTC 914  
P\_Sicala40\_At TACTTTAAATTAACCAACTCTACCCACATTTTCGTTGCTTTCAACTGCGTATAATCTCTC 856  
P\_TM-1\_At TACTTTAAATTAACCAACTCTACCCACATTTTCGTTGCTTTCAACTGCGTATAATCTCTC 856  
P\_D5 TACTTTAAATTAACCAACTCTACCCACATTTTCGTTGCTTTCAACTGCGTATAATCTCTC 428  
P\_PimaS-7\_Dt TACTTTAAATTAACCAACTCTACCCACATTTTCGTTGCTTTCAACTGCGTATAATCTCTC 915  
P\_Sicala40\_Dt TACTTTAAATTAACCAACTCTACCCACATTTTCGTTGCTTTCAACTGCGTATAATCTCTC 1035  
P\_TM-1\_Dt TACTTTAAATTAACCAACTCTACCCACATTTTCGTTGCTTTCAACTGCGTATAATCTCTC 915  
\*\*\*\*\* \* \*\*\*\*\* \* \*\*\*\*\*

P\_A2 TTTCCTATCATCTCTTTATCATTGTCTGTTTTCAAATTAAGGAACCAAATTCATTGAGG 974  
P\_PimaS-7\_At TTTCCTATCATCTCTTTATCATTGTCTGTTTTCAAATTAAGGAACCAAATTCATTGAGG 974  
P\_Sicala40\_At TTTCCTATCATCTCTTTATCATTGTCTGTTTTCAAATTAAGGAACCAAATTCATTGAGG 916  
P\_TM-1\_At TTTCCTATCATCTCTTTATCATTGTCTGTTTTCAAATTAAGGAACCAAATTCATTGAGG 916  
P\_D5 ---TCTATCATCTCTTTATCATTGTCTGTTTTCAAATTAAGGAACCAAATTCATTGAGG 484  
P\_PimaS-7\_Dt T--CTATCATCTCTTTATCATTGTCTGTTTTCAAATTAAGGAACCAAATTCATTGAGG 973  
P\_Sicala40\_Dt T--CTATCATCTCTTTATCATTGTCTGTTTTCAAATTAAGGAACCAAATTCATTGAGG 1093  
P\_TM-1\_Dt T--CTATCATCTCTTTATCATTGTCTGTTTTCAAATTAAGGAACCAAATTCATTGAGG 973  
\*\*\*\*\* \* \*\*\*\*\* \* \*\*\*\*\*

P\_A2 ATTCGGCCTGGCTTGA-TTCAAAGAACATG 1003  
P\_PimaS-7\_At ATTCGGCCTGGCTTGA-TTCAAAGAACATG 1003  
P\_Sicala40\_At ATTCGGCCTGGCTTGA-TTCAAAGAACATG 945  
P\_TM-1\_At ATTCGGCCTGGCTTGA-TTCAAAGAACATG 945  
P\_D5 ATTCGGCCTGGCTTGACTTCAAAGAACATG 514  
P\_PimaS-7\_Dt ATTCGGCCTGGCTTGACTTCAAAGAACATG 1003  
P\_Sicala40\_Dt ATTCGGCCTGGCTTGACTTCAAAGAACATG 1123  
P\_TM-1\_Dt ATTCGGCCTGGCTTGACTTCAAAGAACATG 1003  
\*\*\*\*\* \* \*\* \*

MYB binding site differs between At and Dt
