# Supplementary material for: Genetic dissection of the fuzzless seed trait in Gossypium barbadense
Source: PubMed Central journal article supplement (PMC6018843; doi:10.1093/jxb/erx459), 2018-01-17
Supplement: erx459_suppl_supplementary_tables_s4.pdf [file erx459_suppl_supplementary_tables_s4.pdf]

Supplementary Table S4 List of genes in the chromosomal regions associated with fuzz development

| Gene ID     | Coordinate1 | Coordinate2 | Annotation                                                           |
|-------------|-------------|-------------|----------------------------------------------------------------------|
| Locus I     |             |             |                                                                      |
| Gh_A08G0068 | 605735      | 606576      | Polynucleotidyl transferase; ribonuclease H-like superfamily protein |
| Gh_A08G0069 | 607704      | 618632      | BRI1 suppressor 1 (BSU1)-like 3                                      |
| Gh_A08G0070 | 626811      | 632509      | Tetratricopeptide repeat (TPR)-like superfamily protein              |
| Gh_A08G0071 | 635236      | 638304      | RING-H2 group F2A                                                    |
| Gh_A08G0072 | 639890      | 642641      |                                                                      |
| Gh_A08G0073 | 645188      | 647657      | HSP20-like chaperones superfamily protein                            |
| Gh_A08G0074 | 651859      | 655829      | Calcium-binding EF hand family protein                               |
| Gh_A08G0075 | 660080      | 664049      | RING/U-box superfamily protein                                       |
| Gh_A08G0076 | 666649      | 667029      |                                                                      |
| Gh_A08G0077 | 670360      | 676471      | nitrate excretion transporter1                                       |
| Gh_A08G0078 | 677321      | 680640      | Transducin/WD40 repeat-like superfamily protein                      |
| Gh_A08G0079 | 682587      | 690807      | vacuolar proton ATPase A1                                            |
| Gh_A08G0080 | 715646      | 716431      | Dof-type zinc finger DNA-binding family protein                      |
| Gh_A08G0081 | 729373      | 731507      | LOB domain-containing protein 11                                     |
| Gh_A08G0082 | 738593      | 739852      | proton gradient regulation 3                                         |
| Gh_A08G0083 | 741880      | 742266      |                                                                      |
| Gh_A08G0084 | 747155      | 747481      | Preprotein translocase Sec; Sec61-beta subunit protein               |
| Gh_A08G0085 | 756097      | 760011      | geminivirus rep interacting kinase 2                                 |
| Gh_A08G0086 | 761897      | 763855      | chaperonin 10                                                        |
| Gh_A08G0087 | 766191      | 768544      | cofactor of nitrate reductase and xanthine dehydrogenase 2           |
| Gh_A08G0088 | 770637      | 772278      | Ribosomal protein L30/L7 family protein                              |
| Gh_A08G0089 | 774792      | 775352      | molybdopterin biosynthesis MoeA family protein                       |
| Gh_A08G0090 | 778549      | 783180      | transferases;nucleotidyltransferases                                 |
| Gh_A08G0091 | 789400      | 790349      | Copper transport protein family                                      |
| Gh_A08G0092 | 792104      | 797877      | dgd1 suppressor 1                                                    |
| Gh_A08G0093 | 799701      | 800255      | ribosomal protein L12-A                                              |
| Gh_A08G0094 | 802103      | 802803      | poly(A) binding protein 3                                            |
| Gh_A08G0095 | 807246      | 808190      | C2H2 type zinc finger transcription factor family                    |
| Gh_A08G0096 | 814685      | 816085      | cytochrome P450; family 94; subfamily D; polypeptide 2               |
| Gh_A08G0097 | 820571      | 821569      | Pentatricopeptide repeat (PPR) superfamily protein                   |

|             |         |                                                                                                  |
|-------------|---------|--------------------------------------------------------------------------------------------------|
| Gh_A08G0098 | 824253  | 825135 Pentatricopeptide repeat (PPR) superfamily protein                                        |
| Gh_A08G0099 | 828676  | 829659 BREVIS RADIX-like 4                                                                       |
| Gh_A08G0100 | 831622  | 836352 Regulator of chromosome condensation (RCC1) family with FYVE zinc finger domain           |
| Gh_A08G0101 | 861724  | 863597 TBP-associated factor 7                                                                   |
| Gh_A08G0102 | 866185  | 868446 Lipase/lipooxygenase; PLAT/LH2 family protein                                             |
| Gh_A08G0103 | 868941  | 873648 protein phosphatase 2A-4                                                                  |
| Gh_A08G0104 | 882017  | 884195 Bifunctional inhibitor/lipid-transfer protein/seed storage 2S albumin superfamily protein |
| Gh_A08G0105 | 887814  | 892025 RNA-binding KH domain-containing protein                                                  |
| Gh_A08G0106 | 897796  | 898770 Family of unknown function (DUF716)                                                       |
| Gh_A08G0107 | 913522  | 914115 Disease resistance-responsive (dirigent-like protein) family protein                      |
| Gh_A08G0108 | 921934  | 922311                                                                                           |
| Gh_A08G0109 | 924211  | 924516                                                                                           |
| Gh_A08G0110 | 925654  | 939192 Protein kinase family protein                                                             |
| Gh_A08G0111 | 942970  | 981899 glucan synthase-like 10                                                                   |
| Gh_A08G0112 | 987489  | 988481 AP2/B3 transcription factor family protein                                                |
| Gh_A08G0113 | 993164  | 996534 NAD(P)-binding Rossmann-fold superfamily protein                                          |
| Gh_A08G0114 | 998459  | 1002012 Emsy N Terminus (ENT)/ plant Tudor-like domains-containing protein                       |
| Gh_A08G0115 | 1006795 | 1011386                                                                                          |
| Gh_A08G0116 | 1013789 | 1015027 AGC (cAMP-dependent; cGMP-dependent and protein kinase C) kinase family protein          |
| Gh_A08G0117 | 1031008 | 1047041 NIMA-related kinase 5                                                                    |
| Gh_A08G0118 | 1048984 | 1055274 outer envelope protein of 80 kDa                                                         |
| Gh_A08G0119 | 1057094 | 1060321 protein serine/threonine kinases;ATP binding;catalytics                                  |
| Gh_A08G0120 | 1078005 | 1082197 RING/U-box superfamily protein                                                           |
| Gh_A08G0121 | 1084526 | 1097630 lysophosphatidyl acyltransferase 2                                                       |
| Gh_A08G0122 | 1107626 | 1111538 RNA-binding (RRM/RBD/RNP motifs) family protein                                          |
| Gh_A08G0123 | 1112762 | 1119644 origin of replication complex 1B                                                         |
| Gh_A08G0124 | 1132198 | 1136371 CRM family member 3A                                                                     |
| Gh_A08G0125 | 1136804 | 1139061 ribosome biogenesis regulatory protein (RRS1) family protein                             |
| Gh_A08G0126 | 1143485 | 1146384 evolutionarily conserved C-terminal region 2                                             |
| Gh_A08G0127 | 1148892 | 1155704 Lysyl-tRNA synthetase; class II                                                          |
| Gh_A08G0128 | 1169139 | 1173759 cytochrome P450; family 716; subfamily A; polypeptide 1                                  |
| Gh_A08G0129 | 1184451 | 1184681                                                                                          |
| Gh_A08G0130 | 1188184 | 1189767 Tetratricopeptide repeat (TPR)-like superfamily protein                                  |

|             |         |                                                                                                                 |
|-------------|---------|-----------------------------------------------------------------------------------------------------------------|
| Gh_A08G0131 | 1194031 | 1195443 F-box and associated interaction domains-containing protein                                             |
| Gh_A08G0132 | 1198692 | 1199801 F-box and associated interaction domains-containing protein                                             |
| Gh_A08G0133 | 1206673 | 1207791 F-box and associated interaction domains-containing protein                                             |
| Gh_A08G0134 | 1220398 | 1221810 F-box and associated interaction domains-containing protein                                             |
| Gh_A08G0135 | 1226599 | 1227708 F-box and associated interaction domains-containing protein                                             |
| Gh_A08G0136 | 1258378 | 1259471 F-box and associated interaction domains-containing protein                                             |
| Gh_A08G0137 | 1276309 | 1277460 F-box and associated interaction domains-containing protein                                             |
| Gh_A08G0138 | 1280549 | 1285631 Protein kinase superfamily protein                                                                      |
| Gh_A08G0139 | 1289685 | 1294363 ARM repeat superfamily protein                                                                          |
| Gh_A08G0140 | 1294754 | 1295488                                                                                                         |
| Gh_A08G0141 | 1320838 | 1322935 alpha/beta-Hydrolases superfamily protein                                                               |
| Gh_A08G0142 | 1328225 | 1329880 alpha/beta-Hydrolases superfamily protein                                                               |
| Gh_A08G0143 | 1342590 | 1348723 cycloartenol synthase 1                                                                                 |
| Gh_A08G0144 | 1355393 | 1359375 protein serine/threonine kinases;protein kinases;ATP binding;sugar binding;kinases;carbohydrate binding |
| Gh_A08G0145 | 1360470 | 1367897 transducin family protein / WD-40 repeat family protein                                                 |
| Gh_A08G0146 | 1370593 | 1425719 Transducin/WD40 repeat-like superfamily protein                                                         |
| Gh_A08G0147 | 1425790 | 1426257                                                                                                         |
| Gh_A08G0148 | 1430786 | 1431430                                                                                                         |
| Gh_A08G0149 | 1432533 | 1435881 RNA-binding (RRM/RBD/RNP motifs) family protein                                                         |
| Gh_A08G0150 | 1436829 | 1440964 myb-like HTH transcriptional regulator family protein                                                   |
| Gh_A08G0151 | 1444635 | 1447087 chaperone binding;ATPase activators                                                                     |
| Gh_A08G0152 | 1449010 | 1464668                                                                                                         |
| Gh_A08G0153 | 1466339 | 1467817 Ubiquitin carboxyl-terminal hydrolase family protein                                                    |
| Gh_A08G0154 | 1469328 | 1471841 S-locus lectin protein kinase family protein                                                            |
| Gh_A08G0155 | 1472956 | 1477228 regulatory particle non-ATPase 13                                                                       |
| Gh_A08G0156 | 1483462 | 1485591 Leucine-rich repeat protein kinase family protein                                                       |
| Gh_A08G0157 | 1491172 | 1492005 Leucine-rich repeat protein kinase family protein                                                       |
| Gh_A08G0158 | 1501016 | 1513459 autoinhibited Ca(2+)-ATPase 10                                                                          |
| Gh_A08G0159 | 1529900 | 1534947 TRICHOME BIREFRINGENCE-LIKE 5                                                                           |
| Gh_A08G0160 | 1543084 | 1546994 RNA-binding KH domain-containing protein                                                                |
| Gh_A08G0161 | 1576215 | 1583323 subtilisin-like serine protease 3                                                                       |
| Gh_A08G0162 | 1585175 | 1587157 rna processing factor 2                                                                                 |
| Gh_A08G0163 | 1590314 | 1593141 Core-2/l-branching beta-1;6-N-acetylglucosaminyltransferase family protein                              |

|             |         |                                                                                  |
|-------------|---------|----------------------------------------------------------------------------------|
| Gh_A08G0164 | 1602745 | 1607164 metaxin-related                                                          |
| Gh_A08G0165 | 1609729 | 1617201 valyl-tRNA synthetase / valine--tRNA ligase (VALRS)                      |
| Gh_A08G0166 | 1619387 | 1622482 S-adenosyl-L-methionine-dependent methyltransferases superfamily protein |
| Gh_A08G0167 | 1623900 | 1627469 S-adenosyl-L-methionine-dependent methyltransferases superfamily protein |
| Gh_A08G0168 | 1661189 | 1666868 PDI-like 5-3                                                             |
| Gh_A08G0169 | 1669026 | 1673900 Ypt/Rab-GAP domain of gyp1p superfamily protein                          |
| Gh_A08G0170 | 1674619 | 1678643 formin homology5                                                         |
| Gh_A08G0171 | 1716135 | 1719173 Leucine-rich repeat transmembrane protein kinase family protein          |
| Gh_A08G0172 | 1728675 | 1729610 histone H2A 10                                                           |
| Gh_A08G0173 | 1737158 | 1739425 plastid developmental protein DAG; putative                              |
| Gh_A08G0174 | 1744554 | 1744856 Calcium-binding EF-hand family protein                                   |
| Gh_A08G0175 | 1745923 | 1752129 ubiquitin-specific protease 14                                           |
| Gh_A08G0176 | 1754928 | 1756864 Protein kinase superfamily protein                                       |
| Gh_A08G0177 | 1756867 | 1758150 Protein kinase superfamily protein                                       |
| Gh_A08G0178 | 1761442 | 1763104 MYB-like 102                                                             |
| Gh_A08G0179 | 1776126 | 1778325 Protein of unknown function (DUF1223)                                    |
| Gh_A08G0180 | 1784388 | 1785546 Toll-Interleukin-Resistance (TIR) domain family protein                  |
| Gh_A08G0181 | 1811707 | 1816976 Seven transmembrane MLO family protein                                   |
| Gh_A08G0182 | 1819020 | 1827222 Protein kinase superfamily protein                                       |
| Gh_A08G0183 | 1828990 | 1833383 embryo defective 2737                                                    |
| Gh_A08G0184 | 1836691 | 1845060 Auxin-responsive GH3 family protein                                      |
| Gh_A08G0185 | 1851405 | 1858713 P-loop containing nucleoside triphosphate hydrolases superfamily protein |
| Gh_A08G0186 | 1860419 | 1861756                                                                          |
| Gh_A08G0187 | 1862847 | 1864995                                                                          |
| Gh_A08G0188 | 1884282 | 1884638                                                                          |
| Gh_A08G0189 | 1887614 | 1887967                                                                          |
| Gh_A08G0190 | 1904548 | 1904907                                                                          |
| Gh_A08G0191 | 1924683 | 1927435 Lactate/malate dehydrogenase family protein                              |
| Gh_A08G0192 | 1929796 | 1930828 CONSTANS-like 5                                                          |
| Gh_A08G0193 | 1938799 | 2007157 Deoxyxylulose-5-phosphate synthase                                       |
| Gh_A08G0194 | 2030430 | 2035856 Calmodulin-binding protein                                               |
| Gh_A08G0195 | 2040072 | 2041080 xyloglucan endotransglycosylase 6                                        |
| Gh_A08G0196 | 2045365 | 2046186 nicotianamine synthase 4                                                 |

|             |         |                                                                                 |
|-------------|---------|---------------------------------------------------------------------------------|
| Gh_A08G0197 | 2072085 | 2072570 zinc finger protein 2                                                   |
| Gh_A08G0198 | 2104606 | 2106438 Syntaxin/t-SNARE family protein                                         |
| Gh_A08G0199 | 2107006 | 2108392                                                                         |
| Gh_A08G0200 | 2111278 | 2112006                                                                         |
| Gh_A08G0201 | 2114464 | 2119237 P450 reductase 2                                                        |
| Gh_A08G0202 | 2122477 | 2127105 Dihydrolipoamide succinyltransferase                                    |
| Gh_A08G0203 | 2130609 | 2134059 aspartic proteinase A1                                                  |
| Gh_A08G0204 | 2142260 | 2143877 glutathione S-transferase TAU 16                                        |
| Gh_A08G0205 | 2147605 | 2149852 RNase THREE-like protein 3                                              |
| Gh_A08G0206 | 2153108 | 2153785 ethylene responsive element binding factor 3                            |
| Gh_A08G0207 | 2155456 | 2158483 cytidinediphosphate diacylglycerol synthase 2                           |
| Gh_A08G0208 | 2161399 | 2165413 RING/FYVE/PHD zinc finger superfamily protein                           |
| Gh_A08G0209 | 2167957 | 2170585 ATPase; V0 complex; subunit E                                           |
| Gh_A08G0210 | 2171660 | 2173803 syntaxin of plants 51                                                   |
| Gh_A08G0211 | 2177090 | 2178590 Ribosomal protein S8e family protein                                    |
| Gh_A08G0212 | 2183293 | 2186523 WRKY family transcription factor family protein                         |
| Gh_A08G0213 | 2190471 | 2194290 Haloacid dehalogenase-like hydrolase (HAD) superfamily protein          |
| Gh_A08G0214 | 2201257 | 2201978                                                                         |
| Gh_A08G0215 | 2216058 | 2221163 beta-amylase 4                                                          |
| Gh_A08G0216 | 2254518 | 2256860 Histone superfamily protein                                             |
| Gh_A08G0217 | 2258295 | 2260591 nicotinate/nicotinamide mononucleotide adenylyltransferase              |
| Gh_A08G0218 | 2273290 | 2275943 ABC-2 type transporter family protein                                   |
| Gh_A08G0219 | 2276489 | 2279126 heat shock protein 81-3                                                 |
| Gh_A08G0220 | 2308805 | 2311733 heat shock protein 81-3                                                 |
| Gh_A08G0221 | 2316646 | 2319598 Subtilase family protein                                                |
| Gh_A08G0222 | 2321670 | 2327542 Transducin/WD40 repeat-like superfamily protein                         |
| Gh_A08G0223 | 2330202 | 2331843 ubiquitin-conjugating enzyme 30                                         |
| Gh_A08G0224 | 2333535 | 2334113 prenylated RAB acceptor 1.G2                                            |
| Gh_A08G0225 | 2337102 | 2341462                                                                         |
| Gh_A08G0226 | 2420669 | 2423827 proline-rich family protein                                             |
| Gh_A08G0227 | 2426790 | 2439604 protein N-terminal asparagine amidohydrolase family protein             |
| Gh_A08G0228 | 2439937 | 2440263                                                                         |
| Gh_A08G0229 | 2446800 | 2449813 2-oxoglutarate (2OG) and Fe(II)-dependent oxygenase superfamily protein |

|             |         |                                                                                                                    |
|-------------|---------|--------------------------------------------------------------------------------------------------------------------|
| Gh_A08G0230 | 2450729 | 2452961 basic helix-loop-helix (bHLH) DNA-binding superfamily protein                                              |
| Gh_A08G0231 | 2461248 | 2464306 SWAP (Suppressor-of-White-APricot)/surp domain-containing protein / D111/G-patch domain-containing protein |
| Gh_A08G0232 | 2475980 | 2495610 Leucine-rich repeat receptor-like protein kinase family protein                                            |
| Gh_A08G0233 | 2497768 | 2498289 A20/AN1-like zinc finger family protein                                                                    |
| Gh_A08G0234 | 2504903 | 2509504 RNA binding (RRM/RBD/RNP motifs) family protein                                                            |
| Gh_A08G0235 | 2510990 | 2515659 zinc finger (CCCH-type/C3HC4-type RING finger) family protein                                              |
| Gh_A08G0236 | 2541475 | 2544423 C2H2-type zinc finger family protein                                                                       |
| Gh_A08G0237 | 2563405 | 2564770 ADP/ATP carrier 2                                                                                          |
| Gh_A08G0238 | 2574910 | 2576036 myb domain protein 83                                                                                      |
| Gh_A08G0239 | 2583856 | 2588086 MATE efflux family protein                                                                                 |
| Gh_A08G0240 | 2591644 | 2593776 CCCH-type zinc finger protein with ARM repeat domain                                                       |
| Gh_A08G0241 | 2601477 | 2607892 Pectin lyase-like superfamily protein                                                                      |
| Gh_A08G0242 | 2608029 | 2613726 PHD finger family protein                                                                                  |
| Gh_A08G0243 | 2623134 | 2627201 cation/hydrogen exchanger 28                                                                               |
| Gh_A08G0244 | 2629959 | 2632440 Ras-related small GTP-binding family protein                                                               |
| Gh_A08G0245 | 2634758 | 2637198 Protein kinase superfamily protein                                                                         |
| Gh_A08G0246 | 2660210 | 2667367 eukaryotic translation initiation factor 4G                                                                |
| Gh_A08G0247 | 2688010 | 2688762 WUSCHEL related homeobox 13                                                                                |
| Gh_A08G0248 | 2691404 | 2692951 Pentatricopeptide repeat (PPR) superfamily protein                                                         |
| Gh_A08G0249 | 2695978 | 2698456 casein kinase II beta chain 1                                                                              |
| Gh_A08G0250 | 2716431 | 2720098 ELMO/CED-12 family protein                                                                                 |
| Gh_A08G0251 | 2722033 | 2724408 Hyaluronan / mRNA binding family                                                                           |
| Gh_A08G0252 | 2726306 | 2740649 glycine-tRNA ligases                                                                                       |
| Gh_A08G0253 | 2742957 | 2748939 Leucine carboxyl methyltransferase                                                                         |
| Gh_A08G0254 | 2755340 | 2760090 Proteasome component (PCI) domain protein                                                                  |
| Gh_A08G0255 | 2765408 | 2771184 ARABIDILLO-1                                                                                               |
| Gh_A08G0256 | 2803317 | 2805011 Mitochondrial transcription termination factor family protein                                              |
| Gh_A08G0257 | 2806941 | 2807346                                                                                                            |
| Gh_A08G0258 | 2810161 | 2816901 histone mono-ubiquitination 1                                                                              |
| Gh_A08G0259 | 2818489 | 2822306 alpha/beta-Hydrolases superfamily protein                                                                  |
| Gh_A08G0260 | 2857590 | 2861136 PLAC8 family protein                                                                                       |
| Gh_A08G0261 | 2870368 | 2871732 C2H2-type zinc finger family protein                                                                       |
| Gh_A08G0262 | 2883316 | 2886088 structural molecules;transmembrane receptors;structural molecules                                          |

|             |         |                                                                                     |
|-------------|---------|-------------------------------------------------------------------------------------|
| Gh_A08G0263 | 2890380 | 2904762 Ubiquitin-like superfamily protein                                          |
| Gh_A08G0264 | 3115549 | 3115959 Histone superfamily protein                                                 |
| Gh_A08G0265 | 3127209 | 3128333 Plant protein of unknown function (DUF641)                                  |
| Gh_A08G0266 | 3146256 | 3147563 UDP-D-glucuronate 4-epimerase 3                                             |
| Gh_A08G0267 | 3167992 | 3169835 ribosomal protein S13A                                                      |
| Gh_A08G0268 | 3178366 | 3181686 Transducin/WD40 repeat-like superfamily protein                             |
| Gh_A08G0269 | 3182900 | 3185980 N-terminal nucleophile aminohydrolases (Ntn hydrolases) superfamily protein |
| Gh_A08G0270 | 3187399 | 3189285                                                                             |
| Gh_A08G0271 | 3191945 | 3193375 Plant protein of unknown function (DUF641)                                  |
| Gh_A08G0272 | 3204951 | 3207998 SEC7-like guanine nucleotide exchange family protein                        |
| Gh_A08G0273 | 3210757 | 3216992 armadillo repeat kinesin 2                                                  |
| Gh_A08G0274 | 3233678 | 3237228 zinc finger protein-related                                                 |
| Gh_A08G0275 | 3257871 | 3271779 WD-40 repeat family protein / beige-related                                 |
| Gh_A08G0276 | 3279449 | 3279888 HSP20-like chaperones superfamily protein                                   |
| Gh_A08G0277 | 3280560 | 3282382 Uncharacterized conserved protein (DUF2358)                                 |
| Gh_A08G0278 | 3288794 | 3291655 Phosphoenolpyruvate carboxylase family protein                              |
| Gh_A08G0279 | 3292699 | 3296407 Mechanosensitive ion channel protein                                        |
| Gh_A08G0280 | 3300527 | 3300916 brassinosteroid-responsive RING-H2                                          |
| Gh_A08G0281 | 3301898 | 3305153                                                                             |
| Gh_A08G0282 | 3305773 | 3307624 Cytidine/deoxycytidylate deaminase family protein                           |
| Gh_A08G0283 | 3308631 | 3313783 RNAhelicase-like 8                                                          |
| Gh_A08G0284 | 3317942 | 3321244 GATA type zinc finger transcription factor family protein                   |
| Gh_A08G0285 | 3329052 | 3334479 shaggy-like protein kinase 32                                               |
| Gh_A08G0286 | 3338516 | 3342676 S-adenosyl-L-methionine-dependent methyltransferases superfamily protein    |
| Gh_A08G0287 | 3347964 | 3350433 RING/U-box superfamily protein                                              |
| Gh_A08G0288 | 3356954 | 3363390 Calcium-dependent lipid-binding (CaLB domain) family protein                |
| Gh_A08G0289 | 3373820 | 3375633 Uncharacterized conserved protein (DUF2358)                                 |
| Gh_A08G0290 | 3377148 | 3381375 POZ/BTB containin G-protein 1                                               |
| Gh_A08G0291 | 3389857 | 3390123                                                                             |
| Gh_A08G0292 | 3394438 | 3397878 adenine nucleotide transporter 1                                            |
| Gh_A08G0293 | 3406467 | 3412516 nucleotidyltransferases                                                     |
| Gh_A08G0294 | 3416108 | 3417027 cullin4                                                                     |
| Gh_A08G0295 | 3420491 | 3424036 Plant protein 1589 of unknown function                                      |

|             |         |                                                                              |
|-------------|---------|------------------------------------------------------------------------------|
| Gh_A08G0296 | 3426388 | 3426732 lipid transfer protein 6                                             |
| Gh_A08G0297 | 3429656 | 3430509 lipid transfer protein 3                                             |
| Gh_A08G0298 | 3433656 | 3437049                                                                      |
| Gh_A08G0299 | 3462667 | 3463937 myb domain protein 3                                                 |
| Gh_A08G0300 | 3514107 | 3516533 RNA-binding (RRM/RBD/RNP motifs) family protein                      |
| Gh_A08G0301 | 3524119 | 3524487 SAUR-like auxin-responsive protein family                            |
| Gh_A08G0302 | 3531789 | 3532358                                                                      |
| Gh_A08G0303 | 3537709 | 3538327 60S acidic ribosomal protein family                                  |
| Gh_A08G0304 | 3542559 | 3544671 nodulin MtN21 /EamA-like transporter family protein                  |
| Gh_A08G0305 | 3610336 | 3620681                                                                      |
| Gh_A08G0306 | 3634296 | 3635767 germin-like protein 10                                               |
| Gh_A08G0307 | 3672758 | 3676697 Methylenetetrahydrofolate reductase family protein                   |
| Gh_A08G0308 | 3685263 | 3690564 Ypt/Rab-GAP domain of gyp1p superfamily protein                      |
| Gh_A08G0309 | 3692677 | 3693618 Transducin/WD40 repeat-like superfamily protein                      |
| Gh_A08G0310 | 3700006 | 3701115 S-adenosylmethionine decarboxylase                                   |
| Gh_A08G0311 | 3716522 | 3717467 ADP-ribosylation factor-like A1A                                     |
| Gh_A08G0312 | 3721707 | 3722522 plasmodesmata-located protein 7                                      |
| Gh_A08G0313 | 3727697 | 3734144 histone acetyltransferase of the CBP family 1                        |
| Gh_A08G0314 | 3735274 | 3736171 allene oxide cyclase 4                                               |
| Gh_A08G0315 | 3740104 | 3741001 allene oxide cyclase 4                                               |
| Gh_A08G0316 | 3747184 | 3747922 allene oxide cyclase 4                                               |
| Gh_A08G0317 | 3754097 | 3754995 allene oxide cyclase 4                                               |
| Gh_A08G0318 | 3777730 | 3782151 NagB/RpiA/CoA transferase-like superfamily protein                   |
| Gh_A08G0319 | 3785555 | 3792467 decapping 5                                                          |
| Gh_A08G0320 | 3796826 | 3800722                                                                      |
| Gh_A08G0321 | 3807268 | 3807966 RING/U-box superfamily protein                                       |
| Gh_A08G0322 | 3822952 | 3823650 RING/U-box superfamily protein                                       |
| Gh_A08G0323 | 3826196 | 3826885 RING/U-box superfamily protein                                       |
| Gh_A08G0324 | 3834410 | 3835108 RING/U-box superfamily protein                                       |
| Gh_A08G0325 | 3869295 | 3870632 Pyridoxal phosphate (PLP)-dependent transferases superfamily protein |
| Gh_A08G0326 | 3872728 | 3877769 squamosa promoter binding protein-like 1                             |
| Gh_A08G0327 | 3894650 | 3896904 Protein kinase superfamily protein                                   |
| Gh_A08G0328 | 3901534 | 3906517                                                                      |



|             |         |                                                                                  |
|-------------|---------|----------------------------------------------------------------------------------|
| Gh_A08G0329 | 3909170 | 3911010 NAD(P)-binding Rossmann-fold superfamily protein                         |
| Gh_A08G0330 | 3922876 | 3924354 microsomal glutathione s-transferase; putative                           |
| Gh_A08G0331 | 3925270 | 3930468 polyamine oxidase 4                                                      |
| Gh_A08G0332 | 3937037 | 3937495                                                                          |
| Gh_A08G0333 | 3950261 | 3962258 ARM repeat superfamily protein                                           |
| Gh_A08G0334 | 3962978 | 3973684 suppressor of abi3-5                                                     |
| Gh_A08G0335 | 3977922 | 3979781 AMP-dependent synthetase and ligase family protein                       |
| Gh_A08G0336 | 4028572 | 4032453 NAC domain containing protein 28                                         |
| Gh_A08G0337 | 4039893 | 4046464 UDP-glucose pyrophosphorylase 2                                          |
| Gh_A08G0338 | 4047562 | 4051774                                                                          |
| Gh_A08G0339 | 4058514 | 4059868 TPX2 (targeting protein for Xklp2) protein family                        |
| Gh_A08G0340 | 4079325 | 4079675 VQ motif-containing protein                                              |
| Gh_A08G0341 | 4084747 | 4085991 Mitochondrial substrate carrier family protein                           |
| Gh_A08G0342 | 4112704 | 4113435 Pentatricopeptide repeat (PPR) superfamily protein                       |
| Gh_A08G0343 | 4124644 | 4125999 Eukaryotic aspartyl protease family protein                              |
| Gh_A08G0344 | 4155124 | 4157377 PLATZ transcription factor family protein                                |
| Gh_A08G0345 | 4189416 | 4190503 Peroxidase superfamily protein                                           |
| Gh_A08G0346 | 4289296 | 4289624 Peroxidase superfamily protein                                           |
| Gh_A08G0347 | 4289654 | 4290385 Peroxidase superfamily protein                                           |
| Gh_A08G0348 | 4291053 | 4291523 polyubiquitin 10                                                         |
| Gh_A08G0349 | 4292436 | 4292999 Protein phosphatase 2C family protein                                    |
| Gh_A08G0350 | 4314554 | 4316740 Heavy metal transport/detoxification superfamily protein                 |
| Gh_A08G0351 | 4319715 | 4320026                                                                          |
| Gh_A08G0352 | 4332893 | 4334060 ADP-ribosylation factor A1B                                              |
| Gh_A08G0353 | 4334745 | 4339511 gibberellin 2-oxidase 6                                                  |
| Gh_A08G0354 | 4418569 | 4421115 Cyclophilin-like peptidyl-prolyl cis-trans isomerase family protein      |
| Gh_A08G0355 | 4421923 | 4425991 P-loop containing nucleoside triphosphate hydrolases superfamily protein |
| Gh_A08G0356 | 4432478 | 4433161 Plant invertase/pectin methylesterase inhibitor superfamily protein      |
| Gh_A08G0357 | 4434210 | 4437610 P-loop containing nucleoside triphosphate hydrolases superfamily protein |
| Gh_A08G0358 | 4439467 | 4440336                                                                          |
| Gh_A08G0359 | 4460644 | 4461072 basic region/leucine zipper motif 53                                     |
| Gh_A08G0360 | 4466589 | 4468615 Ras-related small GTP-binding family protein                             |
| Gh_A08G0361 | 4474329 | 4477631 thioredoxin family protein                                               |

|             |          |                                                                                                                    |
|-------------|----------|--------------------------------------------------------------------------------------------------------------------|
| Gh_A08G0362 | 4482526  | 4484491                                                                                                            |
| Gh_A08G0363 | 4496475  | 4502681 CTP synthase family protein                                                                                |
| Gh_A08G0364 | 4509441  | 4510034 zinc finger protein 6                                                                                      |
| Gh_A08G0365 | 4581247  | 4581615 Nucleotide-diphospho-sugar transferases superfamily protein                                                |
| Gh_A08G0366 | 4594997  | 4595701 RING/U-box superfamily protein                                                                             |
| Gh_A08G0367 | 4598987  | 4599262 RING/U-box superfamily protein                                                                             |
| Gh_A08G0368 | 4620914  | 4621438                                                                                                            |
| Gh_A08G0369 | 4621897  | 4630862                                                                                                            |
| Gh_A08G0370 | 4700573  | 4707130 fumarase 1                                                                                                 |
| Gh_A08G0371 | 4710904  | 4711874 ethylene-responsive element binding protein                                                                |
| Gh_A08G0372 | 4776320  | 4777555 receptor like protein 9                                                                                    |
| Gh_A08G0373 | 4780477  | 4780764                                                                                                            |
| Gh_A08G0374 | 4781358  | 4783154 Leucine-rich repeat transmembrane protein kinase                                                           |
| Gh_A08G0375 | 4788214  | 4795119 RELA/SPOT homolog 1                                                                                        |
| Gh_A08G0376 | 4801777  | 4802328 Plant invertase/pectin methylesterase inhibitor superfamily protein                                        |
| Gh_A08G0377 | 4803638  | 4805425 ribosomal protein L18                                                                                      |
| Gh_A08G0378 | 4806419  | 4806790 senescence-associated gene 21                                                                              |
| Gh_A08G0379 | 4816653  | 4818889 NADH-ubiquinone oxidoreductase-related                                                                     |
| Gh_A08G0380 | 4820996  | 4822841 HSP20-like chaperones superfamily protein                                                                  |
| Gh_A08G0381 | 4824829  | 4826836 Small nuclear ribonucleoprotein family protein                                                             |
| Locus II    |          |                                                                                                                    |
| Gh_A10G0866 | 18790967 | 18794636 SEC14-like 12                                                                                             |
| Gh_A10G0867 | 18812916 | 18815114 MAP kinase 7                                                                                              |
| Gh_A10G0868 | 18872333 | 18875855 folate transporter 1                                                                                      |
| Gh_A10G0869 | 18876428 | 18884548 FAD-linked oxidases family protein                                                                        |
| Gh_A10G0870 | 18885122 | 18887476 Methylthiotransferase                                                                                     |
| Gh_A10G0871 | 18887952 | 18889452 thioredoxin H-type 1                                                                                      |
| Gh_A10G0872 | 18965723 | 18967778 RTE1-homolog                                                                                              |
| Gh_A10G0873 | 18970654 | 18972268 nodulin MtN21 /EamA-like transporter family protein                                                       |
| Gh_A10G0874 | 18973640 | 18975584 Glutaredoxin family protein                                                                               |
| Gh_A10G0875 | 19013571 | 19015097 ferulic acid 5-hydroxylase 1                                                                              |
| Gh_A10G0876 | 19018573 | 19022698 PHD finger family protein / SWIB complex BAF60b domain-containing protein / GYF domain-containing protein |
| Gh_A10G0877 | 19056758 | 19057687 B-box zinc finger family protein                                                                          |

|             |          |                                                                   |
|-------------|----------|-------------------------------------------------------------------|
| Gh_A10G0878 | 19058757 | 19059512 Lactoylglutathione lyase / glyoxalase I family protein   |
| Gh_A10G0879 | 19091953 | 19092396 NAD(P)-binding Rossmann-fold superfamily protein         |
| Gh_A10G0880 | 19094987 | 19096756 peptidylprolyl cis/trans isomerase; NIMA-interacting 1   |
| Gh_A10G0881 | 19110559 | 19111783 Ribosomal protein L2 family                              |
| Gh_A10G0882 | 19121677 | 19121991 SAUR-like auxin-responsive protein family                |
| Gh_A10G0883 | 19126886 | 19129630 zinc finger (Ran-binding) family protein                 |
| Gh_A10G0884 | 19135722 | 19136784 Homeodomain-like superfamily protein                     |
| Gh_A10G0885 | 19144134 | 19144502                                                          |
| Gh_A10G0886 | 19193297 | 19197076 calcium-dependent protein kinase 28                      |
| Gh_A10G0887 | 19201305 | 19204587 RADIATION SENSITIVE 17                                   |
| Gh_A10G0888 | 19268072 | 19269237 plasma membrane intrinsic protein 3                      |
| Gh_A10G0889 | 19271732 | 19272266                                                          |
| Gh_A10G0890 | 19284868 | 19290141 Golgi-localized GRIP domain-containing protein           |
| Gh_A10G0891 | 19295716 | 19301610 Phosphoinositide phosphatase family protein              |
| Gh_A10G0892 | 19305188 | 19306760 Protein kinase superfamily protein                       |
| Gh_A10G0893 | 19341907 | 19342776 Vacuolar iron transporter (VIT) family protein           |
| Gh_A10G0894 | 19344371 | 19346562 Ribosomal protein S4                                     |
| Gh_A10G0895 | 19360060 | 19362678 Pentatricopeptide repeat (PPR) superfamily protein       |
| Gh_A10G0896 | 19401601 | 19403964 Protein of unknown function (DUF1666)                    |
| Gh_A10G0897 | 19430317 | 19430741                                                          |
| Gh_A10G0898 | 19667028 | 19667381                                                          |
| Gh_A10G0899 | 19726691 | 19731839 UDP-sugar pyrophosphorylase                              |
| Locus III   |          |                                                                   |
| Gh_A10G1126 | 57194822 | 57196222 Protein kinase superfamily protein                       |
| Gh_A10G1127 | 57205771 | 57207386 Protein kinase superfamily protein                       |
| Gh_A10G1128 | 57237749 | 57239146 Protein kinase superfamily protein                       |
| Gh_A10G1129 | 57261653 | 57264212 receptor like protein 35                                 |
| Gh_A10G1130 | 57322109 | 57326044 Leucine-rich receptor-like protein kinase family protein |
| Gh_A10G1131 | 57418967 | 57420707 S-adenosyl-L-homocysteine hydrolase                      |
| Gh_A10G1132 | 57472895 | 57475219 serine hydroxymethyltransferase 4                        |
| Gh_A10G1133 | 57484904 | 57488166 Werner syndrome-like exonuclease                         |
| Gh_A10G1134 | 57669306 | 57670670 UDP-D-glucuronate 4-epimerase 6                          |
| Gh_A10G1135 | 57697584 | 57701455 methylenetetrahydrofolate reductase 2                    |

|             |          |                                                               |
|-------------|----------|---------------------------------------------------------------|
| Gh_A10G1136 | 57732952 | 57740376                                                      |
| Gh_A10G1137 | 57847838 | 57851848 RNA recognition motif (RRM)-containing protein       |
| Gh_A10G1138 | 57889117 | 57909260 ARM repeat superfamily protein                       |
| Gh_A10G1139 | 57936838 | 57938115                                                      |
| Gh_A10G1140 | 57988795 | 57990291 ralf-like 24                                         |
| Gh_A10G1141 | 58046988 | 58048157 Exostosin family protein                             |
| Gh_A10G1142 | 58054211 | 58054426                                                      |
| Gh_A10G1143 | 58134995 | 58151527 AMP-dependent synthetase and ligase family protein   |
| Gh_A10G1144 | 58305761 | 58308406 selenium-binding protein 2                           |
| Gh_A10G1145 | 58325987 | 58326912                                                      |
| Gh_A10G1146 | 58356513 | 58356851 ralf-like 32                                         |
| Gh_A10G1147 | 58358312 | 58361580 Putative methyltransferase family protein            |
| Locus IV    |          |                                                               |
| Gh_D07G0847 | 11059477 | 11062522 Ypt/Rab-GAP domain of gyp1p superfamily protein      |
| Gh_D07G0848 | 11064085 | 11067939 ankyrin repeat family protein                        |
| Gh_D07G0849 | 11068594 | 11072456 fimbrin-like protein 2                               |
| Gh_D07G0850 | 11076746 | 11077543 FASCICLIN-like arabinogalactan 7                     |
| Gh_D07G0851 | 11086362 | 11089049 Immunoglobulin E-set superfamily protein             |
| Gh_D07G0852 | 11110068 | 11113249 RNA-binding (RRM/RBD/RNP motifs) family protein      |
| Gh_D07G0853 | 11115279 | 11116960 RNA-binding (RRM/RBD/RNP motifs) family protein      |
| Gh_D07G0854 | 11121945 | 11128589 Kinase-related protein of unknown function (DUF1296) |
| Gh_D07G0855 | 11128727 | 11129101                                                      |
| Gh_D07G0856 | 11138242 | 11140228 RNA-binding (RRM/RBD/RNP motifs) family protein      |
| Gh_D07G0857 | 11146245 | 11150681 AMP-dependent synthetase and ligase family protein   |
| Gh_D07G0858 | 11153344 | 11156901                                                      |
| Gh_D07G0859 | 11211102 | 11211575 F-box family protein                                 |
| Gh_D07G0860 | 11214658 | 11216709 DNAJ heat shock N-terminal domain-containing protein |
| Gh_D07G0861 | 11221175 | 11223955 Sterile alpha motif (SAM) domain-containing protein  |
| Gh_D07G0862 | 11227186 | 11227542                                                      |
| Gh_D07G0863 | 11229973 | 11235506 Peptidase M28 family protein                         |
| Gh_D07G0864 | 11241244 | 11243162 Protein of unknown function (DUF1423)                |
| Gh_D07G0865 | 11244287 | 11245975                                                      |
| Gh_D07G0866 | 11248401 | 11248853 RING/U-box superfamily protein                       |

|             |          |                                                                                   |
|-------------|----------|-----------------------------------------------------------------------------------|
| Gh_D07G0867 | 11252477 | 11254842 CONSTANS-like 9                                                          |
| Gh_D07G0868 | 11279915 | 11282977 Homeodomain-like protein with RING/FYVE/PHD-type zinc finger domain      |
| Gh_D07G0869 | 11283749 | 11285716 Endomembrane protein 70 protein family                                   |
| Gh_D07G0870 | 11286463 | 11288875 HhH-GPD base excision DNA repair family protein                          |
| Gh_D07G0871 | 11290845 | 11293966 glyoxylate reductase 1                                                   |
| Gh_D07G0872 | 11297101 | 11297334                                                                          |
| Gh_D07G0873 | 11299853 | 11301672                                                                          |
| Gh_D07G0874 | 11364649 | 11367705 Leucine-rich repeat receptor-like protein kinase family protein          |
| Gh_D07G0875 | 11370927 | 11373183 P-loop containing nucleoside triphosphate hydrolases superfamily protein |
| Gh_D07G0876 | 11383782 | 11387128 formin homology 1                                                        |
| Gh_D07G0877 | 11400246 | 11408097 FRIGIDA-like protein                                                     |
| Gh_D07G0878 | 11409520 | 11410414 photosystem I subunit I                                                  |
| Gh_D07G0879 | 11422845 | 11428480 Glutamate receptor family protein                                        |
| Gh_D07G0880 | 11432436 | 11437676 Glutamate receptor family protein                                        |
| Gh_D07G0881 | 11441079 | 11446687 glutamate receptor 1.3                                                   |
| Gh_D07G0882 | 11467358 | 11472903 glutamate receptor 1.4                                                   |
| Gh_D07G0883 | 11516557 | 11516844                                                                          |
| Gh_D07G0884 | 11531199 | 11532233                                                                          |
| Gh_D07G0885 | 11534967 | 11539318 SKU5 similar 3                                                           |
| Gh_D07G0886 | 11559013 | 11559607 Lactoylglutathione lyase / glyoxalase I family protein                   |
| Gh_D07G0887 | 11562508 | 11563176 YGGT family protein                                                      |
| Gh_D07G0888 | 11563692 | 11563940                                                                          |
| Gh_D07G0889 | 11570347 | 11571158                                                                          |
| Gh_D07G0890 | 11575782 | 11579222 asparaginyl-tRNA synthetase 2                                            |
| Gh_D07G0891 | 11579684 | 11587946 lipase class 3 family protein                                            |
| Gh_D07G0892 | 11594283 | 11596819 Auxin-responsive family protein                                          |
| Gh_D07G0893 | 11600674 | 11602101 Ribosomal protein L32e                                                   |
| Gh_D07G0894 | 11604772 | 11606417 Ribosomal protein L32e                                                   |
| Gh_D07G0895 | 11621163 | 11622802 Ribosomal protein L32e                                                   |
| Gh_D07G0896 | 11624821 | 11625726 Protein of unknown function (DUF506)                                     |
| Gh_D07G0897 | 11648262 | 11651781 basic helix-loop-helix (bHLH) DNA-binding superfamily protein            |
| Gh_D07G0898 | 11659953 | 11663346 FKBP-type peptidyl-prolyl cis-trans isomerase family protein             |
| Gh_D07G0899 | 11682580 | 11683743 Pentatricopeptide repeat (PPR) superfamily protein                       |

|             |          |                                                                                                   |
|-------------|----------|---------------------------------------------------------------------------------------------------|
| Gh_D07G0900 | 11686977 | 11687426                                                                                          |
| Gh_D07G0901 | 11705043 | 11706491 Oxidoreductase; zinc-binding dehydrogenase family protein                                |
| Gh_D07G0902 | 11706712 | 11707305 Oxidoreductase; zinc-binding dehydrogenase family protein                                |
| Gh_D07G0903 | 11715091 | 11718185 Oxidoreductase; zinc-binding dehydrogenase family protein                                |
| Gh_D07G0904 | 11720140 | 11723657 Oxidoreductase; zinc-binding dehydrogenase family protein                                |
| Gh_D07G0905 | 11726619 | 11729828 Oxidoreductase; zinc-binding dehydrogenase family protein                                |
| Gh_D07G0906 | 11731919 | 11734498 Oxidoreductase; zinc-binding dehydrogenase family protein                                |
| Gh_D07G0907 | 11743446 | 11744202                                                                                          |
| Gh_D07G0908 | 11744744 | 11748774 Cyclin family protein                                                                    |
| Gh_D07G0909 | 11751396 | 11753851 Tetratricopeptide repeat (TPR)-like superfamily protein                                  |
| Gh_D07G0910 | 11776584 | 11779939 cytochrome P450; family 82; subfamily G; polypeptide 1                                   |
| Gh_D07G0911 | 11816943 | 11819051 cytochrome P450; family 82; subfamily G; polypeptide 1                                   |
| Gh_D07G0912 | 11863897 | 11866672 cytochrome P450; family 82; subfamily G; polypeptide 1                                   |
| Gh_D07G0913 | 11891038 | 11893713 Nucleotide-diphospho-sugar transferases superfamily protein                              |
| Gh_D07G0914 | 11924534 | 11925631                                                                                          |
| Gh_D07G0915 | 11965503 | 11966135 RING/U-box superfamily protein                                                           |
| Gh_D07G0916 | 11973296 | 11975830 Integrase-type DNA-binding superfamily protein                                           |
| Gh_D07G0917 | 11977663 | 11979305 Mitochondrial import inner membrane translocase subunit Tim17/Tim22/Tim23 family protein |
| Gh_D07G0918 | 11988503 | 11994329 RNA binding (RRM/RBD/RNP motifs) family protein                                          |
| Gh_D07G0919 | 11998289 | 12000939 DNA repair (Rad51) family protein                                                        |
| Gh_D07G0920 | 12050539 | 12053123 transportin 1                                                                            |
| Gh_D07G0921 | 12061318 | 12061524                                                                                          |
| Gh_D07G0922 | 12082767 | 12083318                                                                                          |
| Gh_D07G0923 | 12083661 | 12088342 Protein of unknown function (DUF604)                                                     |
| Gh_D07G0924 | 12099291 | 12101164 BTB/POZ domain-containing protein                                                        |
| Gh_D07G0925 | 12101512 | 12102438                                                                                          |
| Gh_D07G0926 | 12115528 | 12116219 Embryo-specific protein 3; (ATS3)                                                        |
| Gh_D07G0927 | 12127346 | 12127657                                                                                          |
| Gh_D07G0928 | 12164885 | 12168659 ferric reductase-like transmembrane component family protein                             |
| Gh_D07G0929 | 12217497 | 12219579 CCT motif family protein                                                                 |
| Gh_D07G0930 | 12230924 | 12231382 HSP20-like chaperones superfamily protein                                                |
| Gh_D07G0931 | 12268623 | 12273213 ER-type Ca <sup>2+</sup> -ATPase 1                                                       |
| Gh_D07G0932 | 12311508 | 12311963                                                                                          |

|             |          |                                                                   |
|-------------|----------|-------------------------------------------------------------------|
| Gh_D07G0933 | 12314882 | 12317233 hercules receptor kinase 1                               |
| Gh_D07G0934 | 12336129 | 12338375 Ankyrin repeat family protein                            |
| Gh_D07G0935 | 12394627 | 12396430                                                          |
| Gh_D07G0936 | 12410514 | 12411914 3-ketoacyl-CoA synthase 12                               |
| Gh_D07G0937 | 12444178 | 12446010 exocyst subunit exo70 family protein H7                  |
| Gh_D07G0938 | 12470559 | 12471186 Heavy metal transport/detoxification superfamily protein |
| Gh_D07G0939 | 12484619 | 12485599 ribosomal protein L23AA                                  |
| Gh_D07G0940 | 12491403 | 12492431 Protein of unknown function (DUF1635)                    |
| Gh_D07G0941 | 12521294 | 12522240 myb domain protein 48                                    |
| Gh_D07G0942 | 12583984 | 12596687 Domain of unknown function (DUF966)                      |
| Gh_D07G0943 | 12610365 | 12612298 PIF / Ping-Pong family of plant transposases             |
| Gh_D07G0944 | 12614692 | 12615718 Ribosomal protein S8 family protein                      |
| Gh_D07G0945 | 12635197 | 12635652 Histone superfamily protein                              |
| Gh_D07G0946 | 12636321 | 12636641                                                          |
| Gh_D07G0947 | 12645084 | 12647125 RNA-binding (RRM/RBD/RNP motifs) family protein          |
| Gh_D07G0948 | 12663993 | 12666915                                                          |
| Gh_D07G0949 | 12683145 | 12683754 dessication-induced 1VOC superfamily protein             |
| Gh_D07G0950 | 12684290 | 12686300 ubiquitin-conjugating enzyme 13                          |
| Gh_D07G0951 | 12710159 | 12710999 WUSCHEL related homeobox 2                               |
| Gh_D07G0952 | 12714329 | 12714589                                                          |
| Gh_D07G0953 | 12719410 | 12720306                                                          |
| Gh_D07G0954 | 12761737 | 12762883 Dof-type zinc finger DNA-binding family protein          |
| Gh_D07G0955 | 12853446 | 12855057 plasmodesmata-located protein 7                          |
| Gh_D07G0956 | 12910767 | 12914844 plant U-box 13                                           |
| Gh_D07G0957 | 12963812 | 12965086 HXXXD-type acyl-transferase family protein               |
| Gh_D07G0958 | 13006266 | 13006550                                                          |
| Gh_D07G0959 | 13010269 | 13012514 51 kDa subunit of complex I                              |
| Gh_D07G0960 | 13014095 | 13019403 SEC12P-like 2 protein                                    |
| Gh_D07G0961 | 13022634 | 13023116 heat shock protein 18.2                                  |
| Gh_D07G0962 | 13051596 | 13053994 XB3 ortholog 1 in Arabidopsis thaliana                   |
| Gh_D07G0963 | 13054865 | 13056609                                                          |
| Gh_D07G0964 | 13058943 | 13059452                                                          |
| Gh_D07G0965 | 13073468 | 13075112 actin 1                                                  |

|             |          |                                                                           |
|-------------|----------|---------------------------------------------------------------------------|
| Gh_D07G0966 | 13075827 | 13077517 Fasciclin-like arabinogalactan family protein                    |
| Gh_D07G0967 | 13086927 | 13088037 Tetratricopeptide repeat (TPR)-like superfamily protein          |
| Gh_D07G0968 | 13088050 | 13088976 Tetratricopeptide repeat (TPR)-like superfamily protein          |
| Gh_D07G0969 | 13089370 | 13090399 outer plastid envelope protein 16-1                              |
| Gh_D07G0970 | 13093746 | 13094732 CAX interacting protein 4                                        |
| Gh_D07G0971 | 13111450 | 13115948 arginine methyltransferase 11                                    |
| Gh_D07G0972 | 13120467 | 13122276 beta-ureidopropionase                                            |
| Gh_D07G0973 | 13149189 | 13149569 flowering promoting factor 1                                     |
| Gh_D07G0974 | 13176766 | 13177922 expansin A4                                                      |
| Gh_D07G0975 | 13206205 | 13208180 Exostosin family protein                                         |
| Gh_D07G0976 | 13209417 | 13211294                                                                  |
| Gh_D07G0977 | 13246821 | 13249124 SCARECROW-like 14                                                |
| Gh_D07G0978 | 13259905 | 13262262 SCARECROW-like 14                                                |
| Gh_D07G0979 | 13271646 | 13275374 cytochrome P450; family 707; subfamily A; polypeptide 2          |
| Gh_D07G0980 | 13306323 | 13306565                                                                  |
| Gh_D07G0981 | 13311248 | 13312333 zinc finger (C3HC4-type RING finger) family protein              |
| Gh_D07G0982 | 13334635 | 13340518 pumilio 1                                                        |
| Gh_D07G0983 | 13341278 | 13341903                                                                  |
| Gh_D07G0984 | 13356669 | 13357685 Homeodomain-like superfamily protein                             |
| Gh_D07G0985 | 13382126 | 13386341 translocon at the outer envelope membrane of chloroplasts 75-III |
| Gh_D07G0986 | 13386938 | 13388427                                                                  |
| Gh_D07G0987 | 13445304 | 13445657                                                                  |
| Gh_D07G0988 | 13446340 | 13449847 Transcription factor IIA; alpha/beta subunit                     |
| Gh_D07G0989 | 13451168 | 13453229 plastid transcriptionally active 16                              |
| Gh_D07G0990 | 13464229 | 13464774 telomerase activator1                                            |
| Gh_D07G0991 | 13478064 | 13480612 type one serine/threonine protein phosphatase 2                  |
| Gh_D07G0992 | 13487032 | 13488138 metal tolerance protein B1                                       |
| Gh_D07G0993 | 13488652 | 13490894 RAB GTPase homolog A2B                                           |
| Gh_D07G0994 | 13499139 | 13499339 HSP20-like chaperones superfamily protein                        |
| Gh_D07G0995 | 13501942 | 13505014 UDP-Glycosyltransferase superfamily protein                      |
| Gh_D07G0996 | 13505993 | 13512771 UDP-glucosyl transferase 76E2                                    |
| Gh_D07G0997 | 13538368 | 13539350                                                                  |
| Gh_D07G0998 | 13541969 | 13543027 maternal effect embryo arrest 60                                 |



|             |          |                                                                                    |
|-------------|----------|------------------------------------------------------------------------------------|
| Gh_D07G0999 | 13545115 | 13546479 ARM repeat superfamily protein                                            |
| Gh_D07G1000 | 13548031 | 13548306 zinc ion binding;nucleic acid binding                                     |
| Gh_D07G1001 | 13595815 | 13597273 UDP-Glycosyltransferase superfamily protein                               |
| Gh_D07G1002 | 13616787 | 13618240 UDP-Glycosyltransferase superfamily protein                               |
| Gh_D07G1003 | 13667683 | 13669154 UDP-glucosyl transferase 76E2                                             |
| Gh_D07G1004 | 13707278 | 13710741 hAT dimerisation domain-containing protein                                |
| Gh_D07G1005 | 13734451 | 13734714 HSP20-like chaperones superfamily protein                                 |
| Gh_D07G1006 | 13767600 | 13799786 Protein kinase protein with tetratricopeptide repeat domain               |
| Gh_D07G1007 | 13800642 | 13802530                                                                           |
| Gh_D07G1008 | 13817441 | 13820373 uncoupling protein 2                                                      |
| Gh_D07G1009 | 13823831 | 13825195 ribonuclease P family protein / Rpp14 family protein                      |
| Gh_D07G1010 | 13830083 | 13833558 calmodulin-binding receptor-like cytoplasmic kinase 1                     |
| Gh_D07G1011 | 13834491 | 13836230 Protein of unknown function (DUF740)                                      |
| Gh_D07G1012 | 13870084 | 13870458 josephin protein-related                                                  |
| Gh_D07G1013 | 13900980 | 13902524 cytochrome P450; family 86; subfamily A; polypeptide 1                    |
| Gh_D07G1014 | 13930669 | 13931820 zinc finger (C2H2 type) family protein                                    |
| Gh_D07G1015 | 13962635 | 13964989 myb domain protein 119                                                    |
| Locus V     |          |                                                                                    |
| Gh_D12G1548 | 46359064 | 46362409 heat shock transcription factor A8                                        |
| Gh_D12G1549 | 46366732 | 46369472 semialdehyde dehydrogenase family protein                                 |
| Gh_D12G1550 | 46371659 | 46386664 ARF-GAP domain 4                                                          |
| Gh_D12G1551 | 46449382 | 46456812 Protein of unknown function (DUF3755)                                     |
| Gh_D12G1552 | 46459203 | 46462594 Leucine-rich repeat protein kinase family protein                         |
| Gh_D12G1553 | 46471427 | 46475035 glutaredoxin-related                                                      |
| Gh_D12G1554 | 46501249 | 46504186 NAD(P)-linked oxidoreductase superfamily protein                          |
| Gh_D12G1555 | 46506145 | 46510135 myo-inositol oxygenase 1                                                  |
| Gh_D12G1556 | 46513482 | 46522251 tobamovirus multiplication protein 3                                      |
| Gh_D12G1557 | 46550083 | 46555842 Calcium-dependent lipid-binding (CaLB domain) family protein              |
| Gh_D12G1558 | 46556735 | 46557196                                                                           |
| Gh_D12G1559 | 46570546 | 46572226 Peroxidase superfamily protein                                            |
| Gh_D12G1560 | 46584783 | 46585541 Ubiquitin-like superfamily protein                                        |
| Gh_D12G1561 | 46589401 | 46589795 Homeodomain-like superfamily protein                                      |
| Gh_D12G1562 | 46600430 | 46601008 Late embryogenesis abundant (LEA) hydroxyproline-rich glycoprotein family |

|             |          |                                                                      |
|-------------|----------|----------------------------------------------------------------------|
| Gh_D12G1563 | 46679355 | 46683260 homeodomain GLABROUS 2                                      |
| Gh_D12G1564 | 46691003 | 46724587 Transmembrane protein 97; predicted                         |
| Gh_D12G1565 | 46733863 | 46734451 Transmembrane protein 97; predicted                         |
| Gh_D12G1566 | 46736441 | 46736753                                                             |
| Gh_D12G1567 | 46740003 | 46741391 Ras-related small GTP-binding family protein                |
| Gh_D12G1568 | 46742388 | 46746298 glutamate receptor 3.4                                      |
| Gh_D12G1569 | 46755414 | 46762909 aconitase 3                                                 |
| Gh_D12G1570 | 46766024 | 46766380                                                             |
| Gh_D12G1571 | 46780267 | 46782207 Ubiquitin-like superfamily protein                          |
| Gh_D12G1572 | 46782934 | 46799934 ARM repeat superfamily protein                              |
| Gh_D12G1573 | 46807922 | 46808941                                                             |
| Gh_D12G1574 | 46821972 | 46826338 Calcium-dependent phosphotriesterase superfamily protein    |
| Gh_D12G1575 | 46828004 | 46829597 Tetratricopeptide repeat (TPR)-like superfamily protein     |
| Gh_D12G1576 | 46839381 | 46844209 Phosphoribulokinase / Uridine kinase family                 |
| Gh_D12G1577 | 46856738 | 46864694 Peroxidase superfamily protein                              |
| Gh_D12G1578 | 46884467 | 46884780 phytosulfokine 4 precursor                                  |
| Gh_D12G1579 | 46892795 | 46893385 basic leucine-zipper 58                                     |
| Gh_D12G1580 | 46915126 | 46922155 Armadillo/beta-catenin-like repeat family protein           |
| Gh_D12G1581 | 46940839 | 46949201 male gametophyte defective 3                                |
| Gh_D12G1582 | 46991591 | 46993522 phosphoinositide 4-kinase gamma 7                           |
| Gh_D12G1583 | 47029047 | 47031500 BES1-interacting Myc-like protein 2                         |
| Gh_D12G1584 | 47031860 | 47036942 Prolyl oligopeptidase family protein                        |
| Gh_D12G1585 | 47038016 | 47039444 BSD domain-containing protein                               |
| Gh_D12G1586 | 47040783 | 47042267 18S pre-ribosomal assembly protein gar2-related             |
| Gh_D12G1587 | 47063564 | 47066044 ACT domain repeat 4                                         |
| Gh_D12G1588 | 47081921 | 47082130                                                             |
| Gh_D12G1589 | 47092661 | 47095212                                                             |
| Gh_D12G1590 | 47097052 | 47104558 DNA binding                                                 |
| Gh_D12G1591 | 47139959 | 47141614 cytochrome P450; family 78; subfamily A; polypeptide 5      |
| Gh_D12G1592 | 47149550 | 47153952 RNA helicase family protein                                 |
| Gh_D12G1593 | 47158178 | 47160474 Major facilitator superfamily protein                       |
| Gh_D12G1594 | 47168597 | 47175885 Major facilitator superfamily protein                       |
| Gh_D12G1595 | 47176357 | 47178244 Dihydropterin pyrophosphokinase / Dihydropterolate synthase |

|             |          |                                                                               |
|-------------|----------|-------------------------------------------------------------------------------|
| Gh_D12G1596 | 47180300 | 47183605 fructokinase-like 2                                                  |
| Gh_D12G1597 | 47186333 | 47195143 Protein kinase superfamily protein                                   |
| Gh_D12G1598 | 47272604 | 47276990 Asparagine synthase family protein                                   |
| Gh_D12G1599 | 47282708 | 47284592 ABL five binding protein 2                                           |
| Gh_D12G1600 | 47285223 | 47288606 Leucine-rich repeat transmembrane protein kinase                     |
| Gh_D12G1601 | 47293065 | 47296525                                                                      |
| Gh_D12G1602 | 47312753 | 47315974 magnesium transporter 3                                              |
| Gh_D12G1603 | 47316258 | 47320540 Purple acid phosphatases superfamily protein                         |
| Gh_D12G1604 | 47322792 | 47326984 Protein of unknown function; DUF647                                  |
| Gh_D12G1605 | 47327647 | 47328398 SPFH/Band 7/PHB domain-containing membrane-associated protein family |
| Gh_D12G1606 | 47334171 | 47334779 SPFH/Band 7/PHB domain-containing membrane-associated protein family |
| Gh_D12G1607 | 47343953 | 47352801 alpha/beta-Hydrolases superfamily protein                            |
| Gh_D12G1608 | 47359014 | 47361422 high mobility group A5                                               |
| Gh_D12G1609 | 47374759 | 47375919 plasmodesmata callose-binding protein 3                              |
| Gh_D12G1610 | 47378322 | 47382834 Tetratricopeptide repeat (TPR)-like superfamily protein              |
| Gh_D12G1611 | 47411421 | 47414852 QUASIMODO2 LIKE 2                                                    |
| Gh_D12G1612 | 47445793 | 47447235 UDP-glucose 6-dehydrogenase family protein                           |
| Gh_D12G1613 | 47457227 | 47462170 C2H2-like zinc finger protein                                        |
| Gh_D12G1614 | 47470423 | 47472824 WRKY DNA-binding protein 57                                          |
| Gh_D12G1615 | 47480036 | 47482078 homologue of bacterial MinE 1                                        |
| Gh_D12G1616 | 47510862 | 47512730 Plant protein of unknown function (DUF863)                           |
| Gh_D12G1617 | 47514901 | 47517093 Tetratricopeptide repeat (TPR)-like superfamily protein              |
| Gh_D12G1618 | 47517741 | 47518307                                                                      |
| Gh_D12G1619 | 47521801 | 47525150 Transducin/WD40 repeat-like superfamily protein                      |
| Gh_D12G1620 | 47525959 | 47526983 eukaryotic elongation factor 5A-1                                    |
| Gh_D12G1621 | 47527458 | 47530331 Protein of unknown function (DUF1336)                                |
| Gh_D12G1622 | 47538053 | 47539099 related to AP2 11                                                    |
| Gh_D12G1623 | 47544233 | 47545654                                                                      |
| Gh_D12G1624 | 47547992 | 47549260 non-ATPase subunit 9                                                 |
| Gh_D12G1625 | 47550155 | 47551929 Vesicle transport v-SNARE family protein                             |
| Gh_D12G1626 | 47560907 | 47565363 VH1-interacting kinase                                               |
| Gh_D12G1627 | 47572421 | 47576158 O-fucosyltransferase family protein                                  |
| Gh_D12G1628 | 47601907 | 47603428 myb domain protein 16 (MYB25-like)                                   |

|             |          |                                 |
|-------------|----------|---------------------------------|
| Gh_D12G1629 | 47649966 | 47650301                        |
| Gh_D12G1630 | 47650316 | 47651139 myb domain protein 106 |
| Gh_D12G1631 | 47755149 | 47755385 mucin-related          |

---
